1 **Stand-alone lipoylated H-protein of the glycine cleavage system enables**  
2 **glycine cleavage and the synthesis of glycine from one-carbon**  
3 **compounds *in vitro***

4  
5 **Yingying Xu<sup>1</sup>, Yuchen Li<sup>1</sup>, Han Zhang<sup>1</sup>, Jinglei Nie<sup>1</sup>, Jie Ren<sup>3</sup>, Wei Wang<sup>2</sup> and**  
6 **An-Ping Zeng<sup>1,2\*</sup>**

7  
8 <sup>1</sup>Beijing Advanced Innovation Center for Soft Matter Science and Engineering, Beijing  
9 University of Chemical Technology, North Third Ring Road 15, Chaoyang District, 100029,  
10 Beijing, China

11 <sup>2</sup>Institute of Bioprocess and Biosystems Engineering, Hamburg University of Technology  
12 Denickestrasse 15, D-21073 Hamburg, Germany

13 <sup>3</sup>State Key Laboratory for Biology of Plant Diseases and Insect Pests/Key Laboratory of  
14 Control of Biological Hazard Factors (Plant Origin) for Agri-product Quality and Safety, Ministry  
15 of Agriculture, Institute of Plant Protection, Chinese Academy of Agricultural Sciences, Beijing  
16 100081, China

17 \* Corresponding author: Prof. An-Ping Zeng

18  
19 **Abstract**

20 H-protein, one of the four component proteins (H, T, P and L) of glycine cleavage  
21 system (GCS), is generally considered a shuttle protein interacting with the other  
22 three GCS-proteins via a lipoyl swinging arm. We report that without P-, T- and  
23 L-proteins, lipoylated H-protein (H<sub>lip</sub>) enables GCS reactions in both glycine cleavage  
24 and synthesis directions *in vitro*. This apparent catalytic activity is closely related to  
25 the cavity on the H-protein surface where the lipoyl arm is attached. Heating or  
26 mutation of selected residues in the cavity destroys or reduces the stand-alone  
27 activity of H<sub>lip</sub>, which can be restored by adding the other three GCS-proteins.  
28 Systematic study of the H<sub>lip</sub>-catalyzed overall GCS reactions and the individual

29 reaction steps provides a first step towards understanding the stand-alone function of  
30 H<sub>lip</sub>. The results in this work provide some inspiration for further understanding the  
31 mechanism of the GCS and give some interesting implications on the evolution of the  
32 GCS.

33 **Keywords:** H-protein, glycine cleavage system, glycine synthesis, One-carbon  
34 metabolism

### 35 **Significance statement**

36 Glycine cleavage system (GCS) plays central roles in C1 and amino acids  
37 metabolisms and the biosynthesis of purines and nucleotides. Manipulations of GCS  
38 are desired to promote plant growth or to treat serious pathophysiological processes  
39 such as aging, obesity and cancers. Reversed GCS reactions form the core of the  
40 reductive glycine pathway (rGP), one of the most promising pathway for the  
41 assimilation of formate and CO<sub>2</sub> in the emerging C1-synthetic biology. H-protein, one  
42 of the four GCS component proteins (H, T, P and L) is generally considered a shuttle  
43 protein interacting with the other three proteins via a lipoyl swinging arm. Here, we  
44 discovered that without P-, T- and L-proteins, H-protein alone can catalyze GCS  
45 reactions in both glycine cleavage and synthesis directions *in vitro*. The surprising  
46 catalytic activities are related to a structural region of H-protein which can be  
47 manipulated. The results have impacts on engineering GCS to treat related diseases,  
48 to improve photorespiration, and to efficiently use C1-carbon for biosynthesis.

### 49 **Introduction**

50 In the mitochondria of plant and animal cells as well as in the cytosol of many  
51 bacteria, the glycine cleavage system (GCS) comprising four (H, T, P and L) proteins  
52 catalyzes the reversible decarboxylation and deamination of glycine to yield CO<sub>2</sub>, NH<sub>3</sub>  
53 and provide a methylene group for the conversion of tetrahydrofolate (THF) to  
54 N<sup>5</sup>,N<sup>10</sup>-methylene-tetrahydrofolate (5,10-CH<sub>2</sub>-THF)<sup>1, 2, 3</sup>. The overall reaction cycle  
55 catalyzed by GCS comprises three steps as illustrated in **Figure 1a** (hereinafter GCS  
56 is used to refer the four-enzyme system regardless of reaction direction). The reaction

57 is first catalyzed by P-protein (glycine decarboxylase; EC 1.4.4.2) to yield CO<sub>2</sub> from  
58 glycine and methylamine-loaded H-protein (H<sub>int</sub>) from the oxidized form (H<sub>ox</sub>) of the  
59 lipoylated H-protein (H<sub>lip</sub>). T-protein (aminomethyltransferase; EC 2.1.2.10) then  
60 catalyzes the release of NH<sub>3</sub> and transfer the methylene group from H<sub>int</sub> to THF to  
61 form 5,10-CH<sub>2</sub>-THF, leaving dihydrolipoyl H-protein (H<sub>red</sub>). Finally, L-protein  
62 (dihydrolipoyl dehydrogenase; EC 1.8.1.4) catalyzes the oxidation of H<sub>red</sub> to  
63 regenerate H<sub>ox</sub> in the presence of NAD<sup>+</sup>. H-protein as a shuttle protein interacts with  
64 the other three GCS-proteins via a lipoyl swinging arm and plays central role in the  
65 GCS.

66 The physiological roles of GCS in various organisms have been well studied. In  
67 human and most vertebrates, GCS is part of the serine and glycine metabolism  
68 pathway. Serine is catalyzed by serine hydroxymethyltransferase (SHMT) to form  
69 glycine and 5,10-CH<sub>2</sub>-THF, and then the product glycine is degraded by GCS. The  
70 final product, 5,10-CH<sub>2</sub>-THF, whose methylene group derived from the β-carbon of  
71 serine or the α-carbon of glycine, is one of the few C1 donors in the biosynthesis  
72 process, such as the biosynthesis of purine and methionine<sup>2</sup>. Decrease or loss in the  
73 activity of GCS will lead to glycine accumulation in human body, which is linked to  
74 glycine encephalopathy<sup>4</sup> (also known as nonketotic hyperglycinemia). Relevant  
75 studies have shown that most patients with glycine encephalopathy have a P-protein  
76 deficiency, and the rest are caused by T-protein or H-protein deficiency<sup>5</sup>. Moreover,  
77 recent studies have shown that glycine metabolism is associated with tumorigenesis,  
78 and P-protein as a key factor regulates glycolysis and methylglyoxal production in  
79 cancer cells<sup>6,7</sup>. In C3 plants, GCS is the key enzymatic system that deals with a large  
80 amount of glycine in mitochondria during the photorespiration, and the activity of GCS  
81 directly determines the growth rate of plants. Knockout of GCS gene is lethal to plants,  
82 which is relevant to impaired one-carbon metabolism<sup>8</sup>, whereas overexpression of  
83 L-protein<sup>9</sup> or H-protein<sup>10</sup> have been shown to improve photorespiration rates for  
84 further increasing biomass yield.

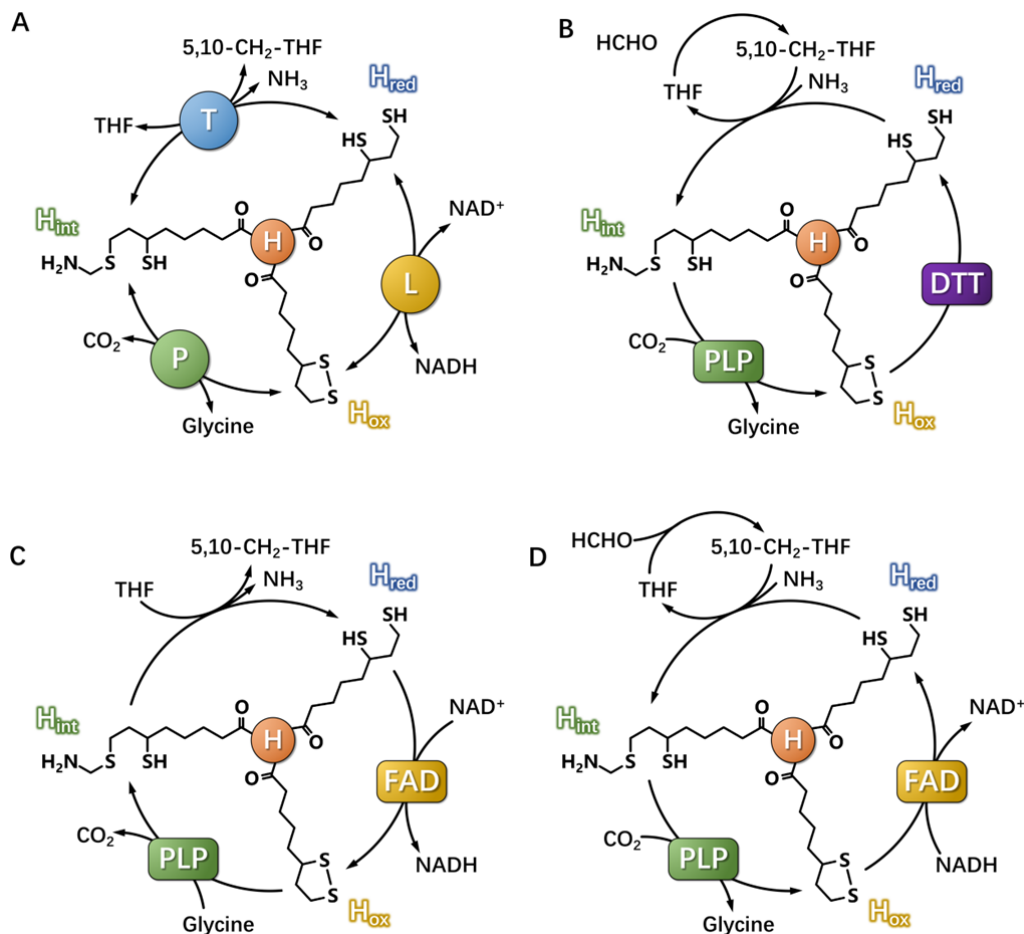

85

86 **Figure 1.** Schematic diagrams of the reversible glycine cleavage reaction catalyzed by GCS  
 87 or stand-alone H-protein (H<sub>ip</sub>). (a) The glycine cleavage and synthesis reactions catalyzed by  
 88 GCS with the complete set of enzymes; (b) Glycine synthesis reactions catalyzed by H<sub>ip</sub> alone  
 89 under the presence of PLP, THF and DTT (DTT as a reductant replacing the functions of FAD  
 90 and NADH); (c) Glycine cleavage and (d) synthesis reactions catalyzed by H<sub>ip</sub> alone under the  
 91 presence of PLP, THF, FAD and NADH.

92 Although GCS in most organisms runs mostly in the direction of glycine cleavage, it  
 93 catalyzes glycine synthesis in a few anaerobic bacteria such as *Clostridium*  
 94 *acidurici*<sup>11</sup>, *Eubacterium acidaminophilum*<sup>12</sup> and *Arthrobacter globiformis*<sup>13, 14</sup>. The  
 95 reversibility of GCS was first discovered in mitochondrial extract of rat liver<sup>15</sup>, in *A.*  
 96 *globiformis*<sup>16</sup> and in cock liver mitochondria<sup>17</sup>, and most of these studies were already  
 97 carried out in 1960-1980s. Today, attributing to the reversibility of GCS, GCS gains  
 98 renewed attention of researchers, because reductive glycine pathway (rGP), with  
 99 GCS as its key component pathway, is considered to be the most promising synthetic  
 100 pathway for the assimilation of formate and CO<sub>2</sub> to produce pyruvate<sup>18</sup>, a key

101 precursor that enters the central metabolic pathway for cell growth and biosynthesis.  
102 Sánchez-Andrea *et al.*<sup>19</sup> discovered that rGP functions in an anaerobic  
103 sulphate-reducing bacterium *Desulfovibrio desulfuricans*, and stated that it represents  
104 the seventh natural CO<sub>2</sub> fixation pathway. Recently, rGP has been successfully  
105 introduced into *E.coli*<sup>20, 21, 22, 23</sup> for autotrophic growth on formate and CO<sub>2</sub>. At the same  
106 time, part of this pathway was successfully transferred into *Saccharomyces*  
107 *cerevisiae*<sup>24</sup>, *Cupriavidus necator*<sup>25</sup> and *Clostridium pasteurianum*<sup>26</sup>. However, the flux  
108 of rGP is quite low, which limits the growth of microorganism. It has been pointed out  
109 that the reaction catalyzed by GCS is the rate-limiting step in rGP<sup>21</sup>. Therefore, it is  
110 particularly important to understand the catalytic mechanism of GCS for increasing  
111 the flux of rGP. Substantial progress has been made in understanding the catalytic  
112 properties of GCS, and H-protein is so far considered to function merely as a shuttle  
113 protein of the cofactor lipoic acid. Lipoic acid is attached by an amide linkage to the  
114 conserved lysine residue of H-protein at the 64<sup>th</sup> position, and the lipoylated H-protein  
115 (H<sub>lip</sub>) plays a pivotal role acting as a mobile substrate which undergoes a cycle of  
116 reductive methylation, methylamine transfer and electron transfer in the  
117 enzymatic cycle of GCS<sup>27</sup>.

118 In this work, we discovered that H<sub>lip</sub> alone can enable the GCS reaction cycle in both  
119 glycine cleavage (**Figure 1b**) and synthesis directions (**Figures 1c and 1d**) in the  
120 absence of P-, T- and L-proteins. The formation of glycine from C1 compounds in the  
121 presence of suitable cofactors was demonstrated by choosing HCHO as the source of  
122 α-carbon of glycine. More detailed analyses led to the striking finding that H<sub>lip</sub> can  
123 apparently “catalyze” all the GCS reaction steps previously believed to be solely  
124 catalyzed by P, T and L-proteins, respectively. These findings not only shed new light  
125 into the functions of H-protein, but also provide useful hints for engineering H-protein  
126 and GCS, either for treating diseases such as hyperglycemia, for enhancing  
127 biomass yield in plants, or for developing synthetic pathways for technical use of  
128 C1-carbons. The fact that stand-alone H<sub>lip</sub> can catalyze the synthesis of the basic  
129 amino acid glycine from inorganic compounds may also have important implications

130 for the evolution of life.

## 131 **Results**

### 132 ***Effects of components of the GCS reaction system on glycine cleavage and*** 133 ***synthesis***

134 On the basis of previous studies<sup>8, 28</sup>, we successfully constructed GCS catalyzed  
135 glycine cleavage and synthesis reactions *in vitro*. Normally, all the four GCS enzymes  
136 are included in the reaction system. During kinetic studies, we found that the reactions  
137 of glycine cleavage and glycine synthesis can also occur in the absence of certain  
138 GCS enzymes and reaction components. This triggered us to systematically examine  
139 the effects of missing a certain component or enzyme in the reaction mixture on the  
140 reaction rate of both reaction directions. As shown in **Table 1**, the lack of a certain  
141 component or enzyme can cause very different changes of the reaction rate. As  
142 expected, the reaction did not occur in the absence of essential substrates (glycine in  
143 the cleavage direction and  $\text{NH}_4\text{HCO}_3$  in the synthesis direction). The presence of the  
144  $\text{H}_{\text{ox}}$  was also vital, as no reaction was observed in the absence of  $\text{H}_{\text{ox}}$ . However,  
145 varied reaction rates (10-76 % of the reference values) were observed when only one  
146 of the P-, T- and L-proteins was missing. Compared to the effects of GCS proteins, the  
147 missing of substrates and cofactors (THF, PLP, NAD or NADH) showed often stronger  
148 effects on the cleavage and synthesis of glycine. In this context, the effects of PLP  
149 were surprising: (1) missing of both P-protein and PLP resulted in neither cleavage  
150 nor synthesis of glycine; (2) while missing PLP alone resulted in strongly impaired  
151 glycine synthesis, it had, however, no negative effect on glycine cleavage. This might  
152 be partially explained by the fact that PLP is covalently bound to P-protein<sup>29, 30, 31</sup>.  
153 Therefore, P-protein expressed in *E. coli* might have PLP covalently bound to it during  
154 its expression. The purified P-protein might still have PLP attached to it and can  
155 therefore function well in decarboxylation without externally adding PLP. On the  
156 contrary, the effect of PLP absence was even worse than the absence of P-protein for  
157 glycine synthesis which implied the importance of PLP for the stand-alone catalytic  
158 activity of  $\text{H}_{\text{lip}}$ .

159

160 **Table 1.** Effects of missing a certain component of the GCS reaction system on the  
 161 rates of glycine cleavage (determined as HCHO formation from the degradation of  
 162 5,10-CH<sub>2</sub>-THF) and glycine synthesis.

| Missing component                | Glycine cleavage reaction                      |        | Glycine synthesis reaction                        |         |
|----------------------------------|------------------------------------------------|--------|---------------------------------------------------|---------|
|                                  | ( $\mu\text{M}$ HCHO $\cdot \text{min}^{-1}$ ) | GCS/ % | ( $\mu\text{M}$ glycine $\cdot \text{min}^{-1}$ ) | rGCS/ % |
| None (Reference)                 | 22.48 $\pm$ 3.47                               | 100.00 | 5.95 $\pm$ 0.13                                   | 100.00  |
| P-protein                        | 2.32 $\pm$ 0.52                                | 10.34  | 2.03 $\pm$ 0.20                                   | 34.07   |
| T-protein                        | 11.67 $\pm$ 0.42                               | 51.91  | 4.55 $\pm$ 0.16                                   | 76.53   |
| L-protein                        | 8.44 $\pm$ 0.57                                | 37.55  | 4.45 $\pm$ 0.15                                   | 74.78   |
| H <sub>ox</sub>                  | 0.00                                           | 0.00   | 0.00                                              | 0.00    |
| P-protein+PLP                    | 0.00                                           | 0.00   | 0.00                                              | 0.00    |
| PLP                              | 24.92 $\pm$ 2.67                               | 110.86 | 0.98 $\pm$ 0.13                                   | 16.42   |
| T-protein+THF                    | 1.11 $\pm$ 0.33                                | 4.93   | 0.43 $\pm$ 0.08                                   | 7.20    |
| THF                              | 0.87 $\pm$ 0.15                                | 3.88   | 0.53 $\pm$ 0.04                                   | 8.94    |
| NAD <sup>+</sup> /NADH           | 4.88 $\pm$ 1.54                                | 21.73  | 5.76 $\pm$ 0.05                                   | 96.72   |
| Glycine                          | 0.00                                           | 0.00   | -                                                 | -       |
| NH <sub>4</sub> HCO <sub>3</sub> | -                                              | -      | 0.00                                              | 0.00    |
| HCHO                             | -                                              | -      | 0.98 $\pm$ 0.02                                   | 16.42   |

163

164 ***H<sub>lip</sub> alone enables glycine synthesis and glycine cleavage reactions***

165 The results in **Table 1** suggested that P-protein, T-protein and L-protein are not  
 166 essential for the functionality of GCS both in glycine cleavage and glycine synthesis  
 167 directions. This led us to the question if H<sub>lip</sub> alone can “catalyze” glycine formation  
 168 from NH<sub>4</sub>HCO<sub>3</sub> and HCHO, or glycine cleavage in the opposite direction.

169 For glycine synthesis, the experimental results with H<sub>lip</sub> as the only GCS protein in  
 170 an array of reaction mixtures are presented in **Figure 2a**. Compared with the glycine

171 synthesis catalyzed by the all four GCS proteins (GCS as control), the reaction rate  
172 catalyzed by H<sub>lip</sub> alone at the same concentration of 10 μM (H-10) was somewhat  
173 lower, but glycine formation was well detected. With the increase of H<sub>ox</sub> concentration  
174 the initial reaction rate increased and the final concentration of glycine synthesized  
175 was higher than that of the control. The above results prove that H<sub>lip</sub> alone can  
176 apparently catalyze the synthesis of glycine from NH<sub>4</sub>HCO<sub>3</sub> and HCHO in the  
177 presence of THF, PLP and DTT. To get the optimum reaction conditions for the glycine  
178 synthesis, the reaction rate of glycine synthesis catalyzed by H<sub>lip</sub> alone was  
179 investigated under conditions of using different buffers, temperatures and pHs. **Figure**  
180 **2b** shows the effect of different types of buffer, in which the order of the catalytic ability  
181 of H<sub>lip</sub> was as follows: Tris-HCl≈Mops > HEPES > PBS. The effect of temperature and  
182 pH on the activity were studied by changing temperature from 4 °C to 95 °C (**Figure**  
183 **2c**), and pH from 6.0 to 10.0 (**Figure 2d**). The reaction rate decreased sharply when  
184 the temperature was higher than 42 °C or pH was higher than 8.0. The optimum  
185 temperature and pH were at 37-42 °C and 7.5-8.0, respectively.

186 For glycine cleavage, the reaction could not be observed even at high H<sub>lip</sub>  
187 concentrations (up to 80 μM) using the same reaction mixture as used for the  
188 GCS-catalyzed glycine cleavage reaction but without P-, T- and L-proteins. Later, we  
189 found out that when FAD, the coenzyme of L-protein, was added, H<sub>lip</sub> alone was  
190 indeed able to activate the glycine cleavage, and the reaction rate increased with the  
191 increase of H<sub>lip</sub> concentration, as shown by the time-courses of NADH formation  
192 (**Figure 2e**) and initial rates of glycine cleavage (**Figure 2f**). The essentiality of FAD  
193 for the glycine cleavage but not for glycine synthesis catalyzed by stand-alone H<sub>lip</sub> is  
194 due to the presence of DTT which can convert H<sub>ox</sub> to H<sub>red</sub> required in the direction of  
195 glycine synthesis (details see below).

196 H-protein is a small heat-stable protein, so heating does not lead to precipitation. In  
197 literature, thermal stability of H-protein is therefore used to terminate the lipoylation of  
198 H-protein catalyzed by the enzyme lipoate-protein ligase A (LplA), in which LplA is  
199 completely denatured and precipitated<sup>32, 33</sup>. We have tried to use heated H<sub>ox</sub> (at 95 °C



200 for 5 min) to catalyze the reactions of glycine synthesis and cleavage, but no reaction  
201 in either direction was observed (the details are discussed in a later section). We  
202 therefore speculate that the structure of  $H_{lip}$  was altered by heating at high  
203 temperature, which made it lose its catalytic activity shown above for glycine  
204 synthesis and cleavage.

205 In order to explore the reasons behind the function of the stand-alone  $H_{lip}$  observed,  
206 we further studied the effect of  $H_{lip}$  alone on the three GCS reaction steps, i.e., the  
207 glycine decarboxylation reaction (accompanied by the reductive aminomethylation of  
208  $H_{ox}$  to  $H_{int}$ ) in the absence of P-protein, the aminomethyl transfer reaction in the  
209 absence of T-protein, and the electron transfer reaction without the presence of  
210 L-protein, respectively.

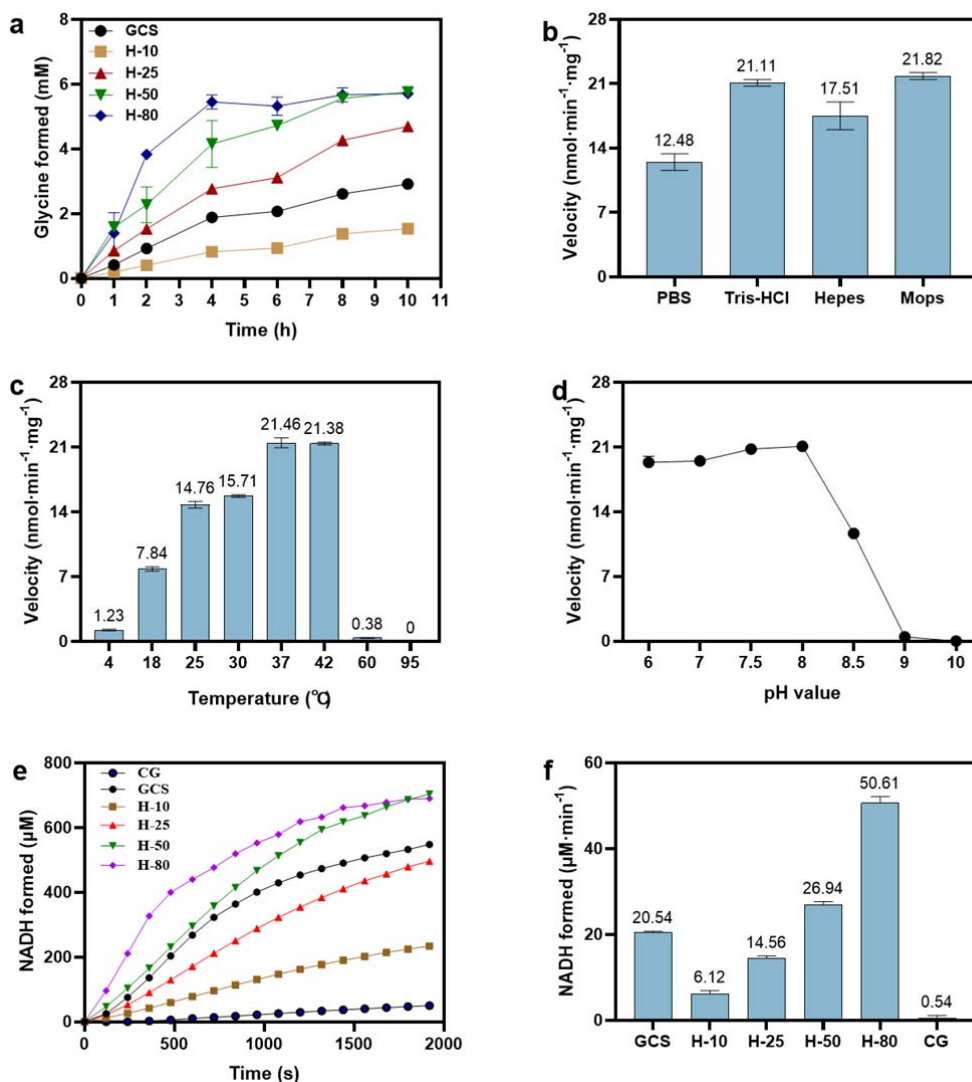

211

212 **Figure 2.** H<sub>lip</sub> alone enabled glycine synthesis and glycine cleavage. Effects of H<sub>ox</sub>  
 213 concentration (a), buffer (b), temperature (c) and pH (d) on glycine synthesis. “GCS” refers to a  
 214 reaction mixture for glycine synthesis as specified in “Materials and Methods” without missing  
 215 any reaction components and enzymes; “H-10”, “H-25”, “H-50” and “H-80” were the same  
 216 reaction mixture containing no P-, T- and L-proteins but only H<sub>ox</sub> at 10 μM, 25 μM, 50 μM and  
 217 80 μM, respectively. (e) Effects of H<sub>ox</sub> concentration on glycine cleavage. “CG” refers to no  
 218 GCS enzymes in the reaction mixture, “GCS” refers to a reaction mixture for glycine cleavage  
 219 as specified in “Materials and Methods” without missing any reaction components and  
 220 enzymes; “H-10”, “H-25”, “H-50” and “H-80” were the same reaction mixture containing no P-,  
 221 T- and L-proteins but only H<sub>ox</sub> at 10 μM, 25 μM, 50 μM and 80 μM, respectively. (f) NADH  
 222 formation rate in glycine cleavage catalyzed by different concentrations of H<sub>ox</sub>.

### 223 **Decarboxylation and carboxylation reactions in the absence of P-protein**

224 The results in **Table 1** revealed that no activity could be measured for either the

225 cleavage or the synthesis of glycine, when both P-protein and PLP were absent in the  
226 reaction mixtures. However, activities were observed when only P-protein was  
227 missing. We therefore speculate that the presence of PLP alone might be sufficient to  
228 enable  $H_{lip}$  to catalyze the decarboxylation/carboxylation reaction normally catalyzed  
229 by P-protein. This was confirmed by the HPLC results shown in **Figure 3a** for the  
230 decarboxylation reaction in the glycine cleavage direction.  $H_{int}$  was formed from  $H_{ox}$   
231 without the presence of P-protein. This astonishing result suggests that glycine  
232 decarboxylation activated by  $H_{lip}$  alone can occur independent of P-protein, as long as  
233 PLP is present (**Figure 3a**) under the experimental conditions of this study.

234 For the carboxylation reaction in the glycine synthesis direction, in the absence of  
235 P-protein, glycine formation could be still detected and the reaction rate showed a  
236 nearly linear increase with the PLP concentration in the low PLP concentration range,  
237 albeit that the reaction rate was lower than those determined in the presence of  
238 P-protein (**Figure 3b**). This is understood that  $CO_2$  fixation (carboxylation) has a  
239 higher energy barrier and P-protein is needed for its activation.

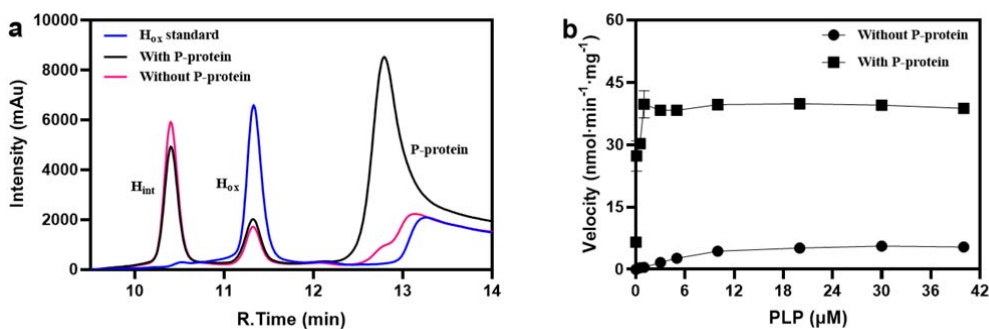

240

241 **Figure 3.** Examination of  $H_{lip}$  ( $H_{ox}$ ) for the function of P-protein. (a) Formation of  $H_{int}$  from  $H_{ox}$   
242 during the glycine decarboxylation reaction was determined using HPLC to show that  $H_{lip}$   
243 functions as decarboxylase in the presence of PLP. Chromatograph “With P-protein” refers to  
244 a reaction mixture containing 50 mM glycine, 50 μM  $H_{ox}$ , 25 μM PLP, and 5 μM P-protein;  
245 Chromatograph “Without P-protein” refers to a reaction mixture similar to that “with P-protein”  
246 but without the addition of P-protein; Chromatograph “ $H_{ox}$  standard” refers to a test solution  
247 containing only  $H_{ox}$ ; (b) PLP-dependent glycine formation was determined to show that  
248 carboxylation can take place in the absence of P-protein, albeit at lower reaction rate. “With  
249 P-protein” refers to a reaction mixture for glycine synthesis as specified in “Materials and  
250 Methods” without missing any reaction components and enzymes, “Without P-protein” refers

251 to a reaction mixture containing all reaction components and enzymes except for P-protein.

### 252 **Aminomethyl transfer reaction in the absence of T-protein**

253 According to the results in **Table 1**, the overall GCS reaction in both glycine  
254 cleavage and glycine synthesis directions could still precede reasonably well in the  
255 absence of T-protein in the reaction mixtures. In comparison, it is obvious that the  
256 absence of THF had a more significant negative effect on the reaction rate regardless  
257 of the reaction directions, i.e. with a reduction of the reaction rate for over 96 % in  
258 glycine cleavage and 91 % in glycine synthesis. **Figure 4a** shows the change of  
259 NADH production with time in the direction of glycine cleavage under different  
260 conditions. The initial rate without adding T-protein was still more than half of that with  
261 adding T-protein, whereas in the experimental group “without THF” the formation of  
262 NADH could be hardly detected. For the aminomethyl transfer reaction in the direction  
263 of glycine synthesis, **Figure 4b** shows that  $H_{int}$  could still be generated without adding  
264 T-protein in the reaction mixture. It was found by Kochi *et al*<sup>14</sup> that when dihydrolipoic  
265 acid, HCHO and  $NH_4^+$  were mixed together, compounds in the form of  $-S-CH_2NH_2$   
266 could be obtained. The question then arises: is the aminomethylation of  $H_{red}$  to  $H_{int}$  in  
267 the absence of T-protein the result of a complete non-enzymatic reaction due to the  
268 presence of HCHO and  $NH_4Cl$  in which H-protein acts only as the shuttle protein?

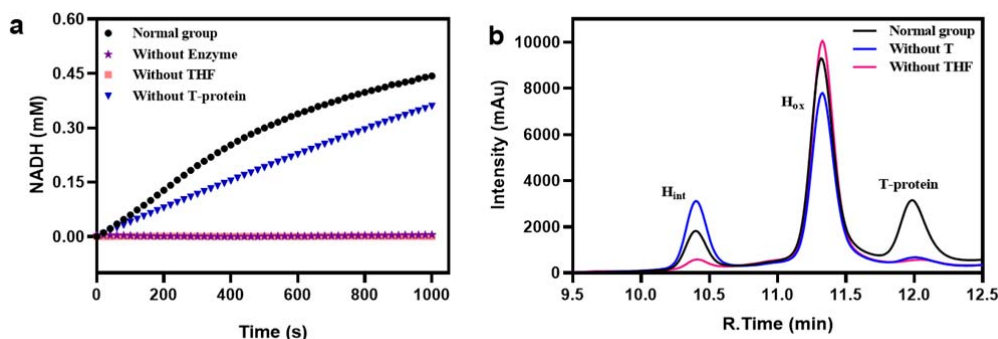

269

270 **Figure 4.** Examination of  $H_{lip}$  for the function of T-protein. (a) Effects of THF or T-protein  
271 absence on the overall glycine cleavage reaction rate. “Normal group” refers to a reaction  
272 mixture containing all reaction components and enzymes required; “Without Enzyme” refers to  
273 a reaction mixture containing all reaction components but no GCS enzymes; “Without THF”  
274 refers to a reaction mixture containing all reaction components and enzymes except for THF;

275 “Without T-protein” refers to a reaction mixture containing all reaction components and  
276 enzymes except for T-protein. (b) Detection of  $H_{\text{int}}$  by HPLC proved that the aminomethyl  
277 transfer reaction can take place spontaneously. “Normal group” refers to a reaction mixture  
278 containing 50  $\mu\text{M}$   $H_{\text{ox}}$ , 0.5 mM THF, 20 mM DTT, 50 mM  $\text{NH}_4\text{Cl}$ , 10 mM HCHO, and 5  $\mu\text{M}$   
279 T-protein; The reaction mixtures of “Without T” and “Without THF” were the same as that of  
280 “Normal group”, but no T-protein or THF was added, respectively.

281

### 282 ***Interconversion of $H_{\text{ox}}$ and $H_{\text{red}}$ in the absence of L-protein***

283 The function of L-protein is to catalyze the interconversion between the  $H_{\text{ox}}$  and its  
284 reduced form dihydrolipoyl H-protein ( $H_{\text{red}}$ ) involving  $\text{NAD}^+/\text{NADH}$  and  $\text{FAD}/\text{FADH}_2$ .  
285 The experimental results in **Table 1** show that in the absence of L-protein both the  
286 glycine cleavage and synthesis systems can still work. Previous studies<sup>34, 35</sup> have  
287 shown that the disulfide bond-reducing agent TCEP allows the reduction of the  
288 disulfide bond of the lipoyl group associated with the H-protein during the course of  
289 the reaction catalyzed by L-protein. Since a certain amount of DTT was added to  
290 prevent the oxidation of THF during the preparation of THF stock solution, we  
291 expected that DTT should have the same reduction function as TCEP. **Figure 5a**  
292 schematically shows the interconversion between  $H_{\text{ox}}$  and  $H_{\text{red}}$  through the  
293 combination of the reduction of  $H_{\text{ox}}$  by TCEP (Left) or DTT (Right) with the re-oxidation  
294 of  $H_{\text{red}}$  catalyzed by L-protein, yielding thereby NADH from added  $\text{NAD}^+$ . The  
295 functionality of this combination was demonstrated by the relevant results presented  
296 in **Figure 5b**. Next, we compared the effects of three different reducing agents (TCEP,  
297 DTT and  $\beta$ -ME) on the reducibility of  $H_{\text{ox}}$  to  $H_{\text{red}}$  in different buffers (Tris-HCl, PBS,  
298 Mops and HEPES) (**Figure 5c**). It was found that the reducibility of  $H_{\text{ox}}$  by DTT in four  
299 different buffers is  $\text{PBS} > \text{Mops} > \text{Tris-HCl} > \text{HEPES}$ ; TCEP had no reducing effect on  
300  $H_{\text{ox}}$  in Tris-HCl but showed the strongest reducing power in PBS, even much better  
301 than DTT.  $\beta$ -ME was obviously not suitable to reduce  $H_{\text{ox}}$  in these four buffers. Thus,  
302 for glycine synthesis, the functionality of L-protein can be well replaced by DTT or  
303 TCEP, as also evidenced by the result shown in **Table 1** that the absence of  
304  $\text{NAD}^+/\text{NADH}$  did not affect glycine synthesis.

305 In order to verify that H<sub>lip</sub> has the catalytic function of L-protein, we used FAD, the  
306 redox coenzyme of L-protein, instead of L-protein in combination with DTT to observe  
307 whether the redox reaction can still occur. To this end, NADH formation as the result  
308 of the redox reaction of H<sub>lip</sub> (**Figure 5a**) by either L-protein or FAD was measured.  
309 Considering the results shown in **Figure 5d** and **Figure 5e**, the following conclusions  
310 can be drawn: (1) As long as L-protein is present, the redox reaction of the disulfide  
311 bond on the lipoyl group is comparable, with the lipoyl group bound to H-protein (H<sub>lip</sub>)  
312 showing a slightly higher activity than that not bound (in lipoic acid). (2) In the absence  
313 of L-protein, the redox reaction of the lipoyl group bound to H-protein still occurred  
314 with the help of FAD, though to a lesser extent, but FAD was not able to replace  
315 L-protein in the reoxidation of dihydrolipoic acid, indicating that binding of the lipoyl  
316 group on H-protein is the prerequisite for the function of FAD in the absence of  
317 L-protein. To find out whether this is simply due to “fixation effect” of lipoyl group  
318 bound to H-protein which enables an easier approach of FAD to the lipoyl group, or  
319 this is facilitated through an unknown interaction of FAD with H-protein, we also  
320 examined to use heat-treated (95 °C for 5 min) H<sub>ox</sub>, which still had the lipoyl arm  
321 linked to it. Interestingly, in the presence of L-protein, there was nearly no difference in  
322 the redox reaction of the lipoyl group between the heated H<sub>ox</sub> and the unheated H<sub>ox</sub>,  
323 however, FAD completely lost its function on the heated H<sub>ox</sub>, clearly suggesting that  
324 an interaction of FAD with H-protein is required for its function in the absence of  
325 L-protein, and heating-induced structural change of H-protein destroyed the possibility  
326 of such interaction.

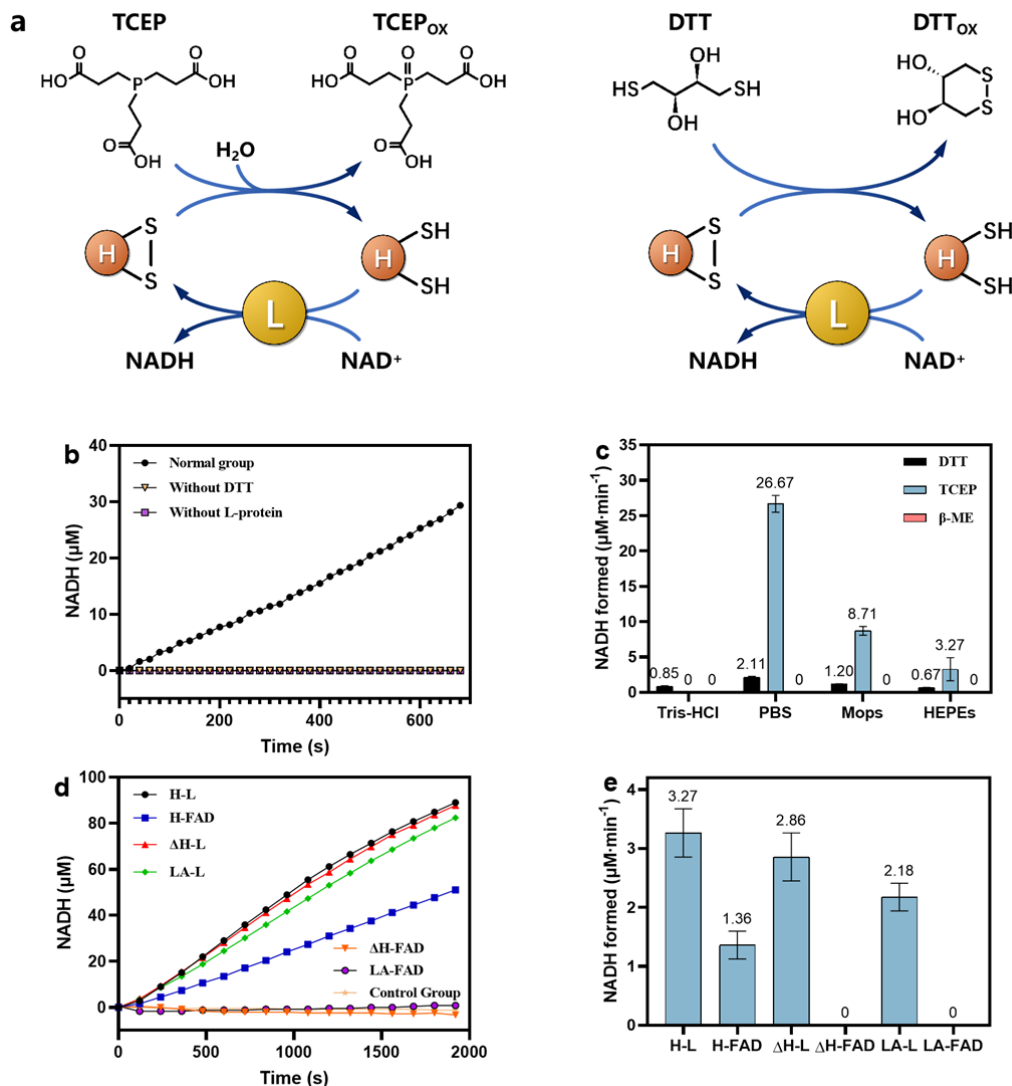

327

328 **Figure 5.** Examination of H<sub>lip</sub> for the function of L-protein. (a) Interconversion between H<sub>ox</sub> and  
 329 H<sub>red</sub> by combining the reduction of H<sub>ox</sub> to H<sub>red</sub> by TCEP (Left) or DTT (Right) with the  
 330 re-oxidation of H<sub>red</sub> to H<sub>ox</sub> catalyzed by L-protein. (b) Reduction of the lipoamide group of H<sub>ox</sub> by  
 331 DTT. “Normal group” refers to a reaction mixture for electron transfer reaction as specified in  
 332 “Materials and Methods” without missing any reaction components and enzymes. “Without  
 333 DTT” refers to a reaction mixture similar to “Normal group” but without adding DTT. “Without  
 334 L-protein” refers to a reaction mixture similar to “Normal group” but without adding L-protein; (c)  
 335 Comparison of different disulfide reductants on the reduction of H<sub>ox</sub> in different buffer solutions.  
 336 (d) Time courses of NADH formation as the result of the redox reaction of H<sub>lip</sub> (H) or heated  
 337 H<sub>lip</sub> (ΔH) or lipoic acid (LA) in the presence of either L-protein (L) or FAD. (e) NADH formation  
 338 rates in the redox reaction of H<sub>ox</sub>, heated H<sub>ox</sub> and lipoic acid in the presence of either L-protein  
 339 or FAD.

340 **Possible reasons of apparent catalytic functions of H<sub>lip</sub> in glycine cleavage and**  
 341 **glycine synthesis**

342 The above results show that for *in vitro* GCS reactions, H<sub>lip</sub> alone enables both the  
343 glycine synthesis and the glycine cleavage without the presence of P-, T-, and  
344 L-proteins. It seems that H<sub>lip</sub> might functionally replace at least P- and L-proteins and  
345 acts as glycine carboxylase and dihydrolipoyl dehydrogenase with the help of PLP  
346 and FAD, respectively. It is also suggested by the experiment results shown in **Figure**  
347 **5d** and **5e** that heated H<sub>ox</sub> lost the catalytic function of L-protein, obviously because  
348 heated H<sub>ox</sub> cannot interact with FAD for the redox reaction of the lipoyl group bound to  
349 H-protein.

350 We therefore further systematically studied the effects of heating (95 °C for 5 min)  
351 on the catalytic activity of H<sub>lip</sub> for glycine synthesis, in comparison to unheated H<sub>ox</sub> as  
352 well as to lipoic acid. By either using H<sub>lip</sub> alone or combined with other GCS enzymes,  
353 the overall reaction rate of glycine synthesis was measured. From the results in **Table**  
354 **2**, we can ascertain several interesting observations and conclusions. First, the  
355 overall glycine synthesis reaction could be catalyzed by the unheated H<sub>ox</sub> alone;  
356 adding P-protein significantly enhanced glycine synthesis, showing the importance of  
357 P-protein; the addition of either T- or L-protein has no positive effect. In fact, the *in*  
358 *vitro* glycine synthesis could run even better without T- and L-proteins, suggesting that  
359 in the presence of H<sub>lip</sub> the two individual steps, namely aminomethyl transfer and  
360 electron transfer catalyzed by the two proteins respectively, could take place through  
361 spontaneous aminomethylation of H<sub>red</sub> to H<sub>int</sub> in the presence of HCHO and NH<sub>4</sub><sup>+</sup> and  
362 reduction of H<sub>lip</sub> to H<sub>red</sub> by DTT. Second, compared with the unheated H<sub>ox</sub>, the heated  
363 H<sub>ox</sub> alone could not catalyze the reaction of glycine synthesis; adding P-protein and  
364 L-protein partially revived glycine synthesis to different extents, indicating that heated  
365 H-protein lost the catalytic ability but was still functional as the shuttle protein of lipoyl  
366 group; the addition of T-protein did not bring any effect. Furthermore, to our surprise,  
367 when the heated H<sub>ox</sub> was added with the other three GCS proteins to form a complete  
368 GCS, the rate of glycine synthesis was even higher than the GCS containing the  
369 unheated H<sub>ox</sub>, indicating that heated H<sub>ox</sub> loses its catalytic function but the  
370 heat-induced change is even beneficial for H-protein to exert its role as a



371 lipoyl-carrying protein to work together with the other three GCS proteins. Finally, in  
372 the presence of P-, T- and L-proteins, free lipoic acid can act as intermediate  
373 substrate to sustain the reversed GCS reaction towards glycine synthesis under the  
374 given experimental conditions, even though to a much lower extent than that  
375 observed in the case of lipoyl group bound to H-protein.

376 **Table 2.** Synthesis of glycine using unheated H<sub>ox</sub> or heated H<sub>ox</sub> or lipoic acid at the  
377 same concentration of 10 μM, either alone or in varied combination with other GCS  
378 enzymes

| Other component(s)<br>added | H <sub>ox</sub><br>(μM • min <sup>-1</sup> ) | heated H <sub>ox</sub><br>(μM • min <sup>-1</sup> ) | Lipoate acid<br>(μM • min <sup>-1</sup> ) |
|-----------------------------|----------------------------------------------|-----------------------------------------------------|-------------------------------------------|
| No other GCS proteins       | 3.41± 0.18                                   | 0.00                                                | 0.00                                      |
| P-protein                   | 6.58± 0.19                                   | 1.54± 0.02                                          | 0.06± 0.01                                |
| T-protein                   | 2.05± 0.38                                   | 0.00                                                | 0.00                                      |
| L-protein                   | 3.03± 0.11                                   | 0.98± 0.03                                          | 0.00                                      |
| P-, T- and L-proteins       | 6.07± 0.04                                   | 8.45± 0.46                                          | 0.21± 0.01                                |

379

380 Heating H<sub>lip</sub> led to the loss of its catalytic activity regarding glycine synthesis.  
381 Although we found no change of the HPLC retention time of H<sub>lip</sub> in the reversed-phase  
382 HPLC chromatograph after heating, which indicates no obvious change in the overall  
383 polarity and size of H<sub>lip</sub>, heating may induce structural changes that are vital for the  
384 catalytic activity of H<sub>lip</sub>. We therefore additionally performed HPLC analysis of H<sub>int</sub> and  
385 H<sub>ox</sub> to further determine the catalytic activity of H<sub>lip</sub> in the two individual reaction steps  
386 normally catalyzed by P-protein and T-protein, respectively. As shown in **Figure 6a**, in  
387 the group of unheated H<sub>ox</sub> the formation of H<sub>int</sub> from H<sub>ox</sub> clearly demonstrated that H<sub>lip</sub>  
388 was not only a lipoyl-carrying protein but could also replace P-protein in catalyzing the  
389 glycine decarboxylation reaction. H<sub>int</sub> was not detected in the group of heated H<sub>ox</sub>,  
390 indicating that heated H<sub>ox</sub> lost the catalytic activity of P-protein. **Figure 6b** shows the  
391 reaction results of aminomethyl transfer from H<sub>red</sub> (generated *in situ* from H<sub>lip</sub>) to H<sub>int</sub>.  
392 The group of unheated H<sub>ox</sub> clearly exhibited the catalytic activity of T-protein; in the

393 group of heated  $H_{ox}$  there was a small amount of  $H_{int}$  formation found, however, this  
394 low level of aminomethyl transfer activity was most likely not due to a catalytic activity  
395 of T-protein manifested by heated  $H_{ox}$ , but due to a spontaneously occurring  
396 aminomethyl transfer reaction. Since heated  $H_{ox}$  still preserves its function as shuttle  
397 protein, the difference between the unheated and heated  $H_{ox}$  in the aminomethyl  
398 transfer reaction may provide an answer to the question in section 3.4 that in the  
399 absence of T-protein, the participation of  $H_{lip}$  in the aminomethyl transfer reaction is  
400 not only as shuttle protein.

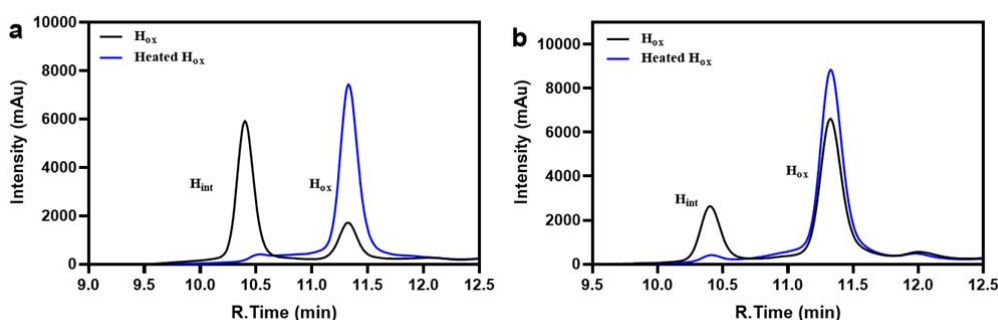

401

402 **Figure 6.** Effects of heating on the catalytic activity of  $H_{lip}$  as decarboxylase or  
403 aminomethyltransferase. (a) Decarboxylation reaction of glycine. “ $H_{ox}$ ” refers to a reaction  
404 mixture containing 50 mM glycine, 50  $\mu$ M  $H_{ox}$ , and 25  $\mu$ M PLP; “heated  $H_{ox}$ ” was the same as  
405 “ $H_{ox}$ ” except for using heated  $H_{ox}$ . (b) Aminomethyl transfer reaction (started from  $H_{ox}$ , which  
406 was reduced to  $H_{red}$  by DTT, before  $H_{red}$  is converted to  $H_{int}$  by aminomethyl transfer reaction).  
407 “ $H_{ox}$ ” refers to a reaction mixture containing 50  $\mu$ M  $H_{ox}$ , 0.5 mM THF, 20 mM DTT, 50 mM  
408  $NH_4Cl$ , and 10 mM HCHO; “heated  $H_{ox}$ ” was the same as “ $H_{ox}$ ” except for using heated  
409 H-protein.

410 To explain the above experimental observations we examined the possibility that  
411 the catalytic ability of unheated  $H_{ox}$  is due to intermolecular interactions of  $H_{lip}$  itself,  
412 and such interactions would enable  $H_{lip}$  to catalyze the interconversion of the different  
413 forms ( $H_{lip}$ ,  $H_{red}$  and  $H_{int}$ ) to complete cycle by cycle the electron transfer, aminomethyl  
414 transfer, and reductive aminomethylation. In order to verify this hypothesis, we  
415 developed a concept to distinguish a possible intermolecular interaction of  $H_{lip}$  from its  
416 function as shuttle protein. On the one hand, the lysine residue at position 64 of  
417 H-protein for binding lipoic acid was mutated into alanine to obtain  $H_{K64A}$  mutant  
418 protein, which is unable to be lipoylated and consequently unable to act as shuttle

419 protein, but is still expected to be able to uphold the capability of intermolecular  
420 interactions of the wild-type H-protein. On the other hand, as discussed above, heated  
421 H<sub>ox</sub> losing its catalytic activity for glycine synthesis well preserves its function as a  
422 shuttle protein. Therefore, if the hypothesis holds true, we would expect that mixing  
423 heated H<sub>ox</sub> with H<sub>K64A</sub> would “restore” the catalytic activity exhibited by unheated H<sub>ox</sub>  
424 towards glycine synthesis. No glycine formation could be detected which rules out the  
425 hypothesis and points out that the interconversion of the three forms of lipoylated  
426 H-protein, and consequently the stand-alone catalytic activity of H-protein, is not the  
427 result of intermolecular interactions of H-protein itself.

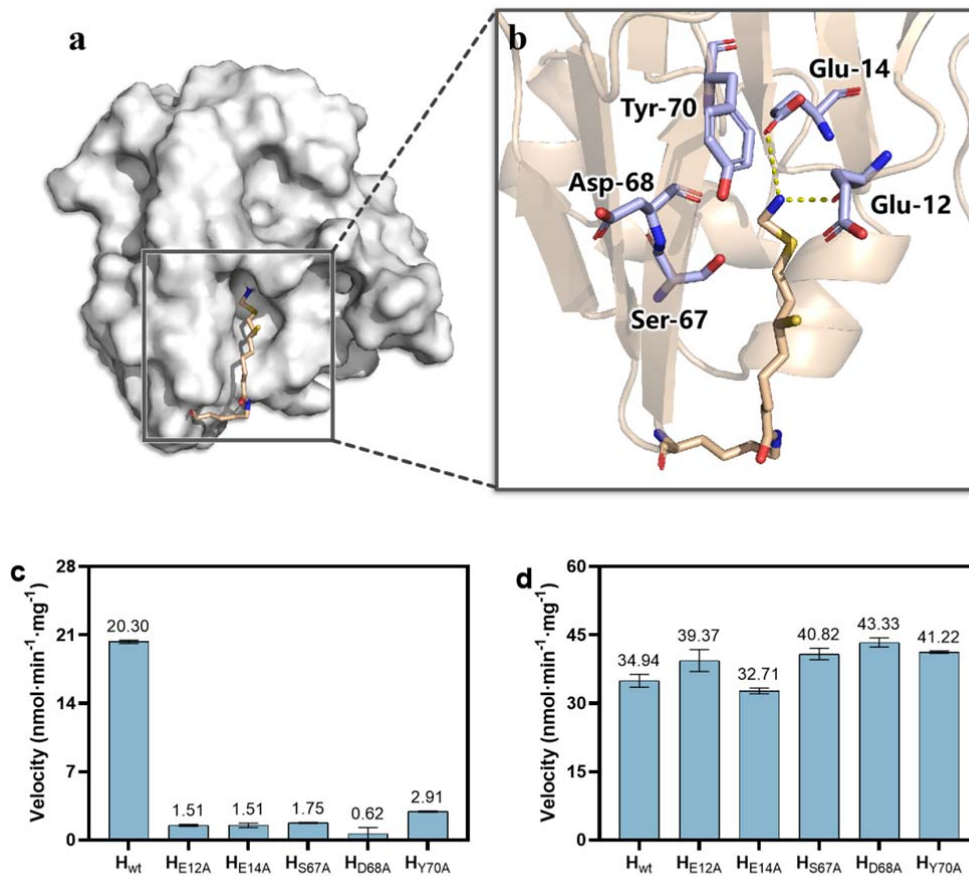

428

429 **Figure 7.** Study of the essential roles of the H-protein cavity. (a) Three-dimensional structure  
430 of *E. coli* H-protein bearing the lipoylated-methylamine arm protected in the cavity (eH<sub>int</sub>). (b)  
431 Docking of the lipoylated-methylamine arm in the cavity with highlighting of some surrounding  
432 amino acid residues selected for mutation. (c) The rate of glycine synthesis catalyzed by  
433 stand-alone H<sub>lip</sub> or its mutants. (d) The rate of glycine synthesis catalyzed by GCS comprising  
434 H<sub>lip</sub> or its mutants and the other three GCS proteins.

435 An answer to the question of why heating destroys the catalytic ability of H-protein  
436 but still preserves its function as shuttle protein might lie in the special surface  
437 structure of H-protein. As shown by the crystal structure of H<sub>int</sub> (**Figure 7a**), following  
438 methylamine transfer the lipoamide-methylamine arm enters into the hydrophobic  
439 cavity on the surface of the H-protein and prevents thereby it from nucleophilic attack  
440 by water molecules<sup>28, 36, 37, 38</sup>. Based on our previously molecular dynamic simulation  
441 study, the lipoamide-methylamine arm may interact with some amino acid residues in  
442 the proximity of the cavity<sup>39</sup>, such as Glu-12, Glu-14, Ser-67, Cys-68 and Tyr-70  
443 (**Figure 7b**). We speculated that the catalytic activity found for the stand-alone H<sub>lip</sub> is  
444 related to the structure of the cavity. Therefore, to verify this assumption, the above  
445 five residues of the wild-type H-protein were mutated to alanine. Assays of glycine  
446 synthesis were then performed with these mutated H<sub>lip</sub> in comparison with the  
447 wild-type H<sub>lip</sub>. As shown in **Figure 7c**, compared to the wild-type H<sub>lip</sub> the glycine  
448 synthesis rates were strongly reduced in reaction mixtures containing H<sub>lip</sub> mutants.  
449 However, as shown in **Figure 7d**, when these mutants were combined with the other  
450 three GCS proteins, the glycine synthesis rates of all the mutants were increased to  
451 levels comparable or even better than that of the wild-type H<sub>lip</sub>. The results are very  
452 similar to what observed with heated H<sub>ox</sub> (**Table 2**). It is therefore confirmed that the  
453 cavity on the H-protein surface plays a decisive role in the catalytic functions of  
454 H-protein, and alterations of the cavity structure (in size or form) either through  
455 mutation or heating will reduce or even destroy the stand-alone catalytic functions of  
456 H-protein (**Figure 7c, Table 2**) due to yet unclear mechanisms. One possible reason  
457 might be that the lipoamide-methylamine arm cannot properly enter the deformed  
458 cavity, resulting in the failure or imbalance of the GCS cycle in the presence of heated  
459 H<sub>ox</sub> alone. By adding other GCS proteins, H-protein is mainly required to act as a  
460 shuttle protein and, consequently, GCS reactions can be revived (**Table 2**). Moreover,  
461 under the given *in vitro* reaction conditions, the lipoamide-methylamine arm may  
462 undergo fast and continuous reaction in the GCS cycle that not only minimizes the  
463 probability of its hydrolysis, but also maintains or even increases the reaction  
464 efficiency by omitting the process of its entry and exit from the cavity (**Figure 7d,**

465 **Table 2).**

## 466 **Discussion**

467 In this work, we show for the first time that stand-alone lipoylated H-protein ( $H_{lip}$ )  
468 has the catalytic functions so far believed to be carried out by the P-, T- and L-proteins  
469 of GCS. It enables glycine cleavage reactions, as well as the reversed reactions  
470 towards glycine synthesis with  $NH_4HCO_3$  and HCHO as the substrates. The  $K_{cat}$  value  
471 for the overall synthesis reaction is about  $0.01\ s^{-1}$  for GCS catalyzed reaction and  
472  $0.0057\ s^{-1}$  for H-protein alone catalyzed reaction. After purification of the GCS  
473 proteins, we used the most commonly used methods SDS-PAGE and HPLC to verify  
474 that there was no obvious residual of other GCS proteins in the purified H-protein  
475 solutions, though we did not confirm this by using more precise methods like mass  
476 spectroscopy. Through calculations, we can state that even if other GCS proteins  
477 would exist in the H-protein solution (e.g. up to 10%), it will not qualitatively affect the  
478 main conclusions drawn in our work (see Supplementary Materials for detailed  
479 explanation). Therefore, the purity of H-protein meets the requirement needed for this  
480 study.

481 The stand-alone catalytic activity of  $H_{lip}$  is closely related to the cavity on the  
482 H-protein surface, where the lipoyl swing arm is bound. Both heating  $H_{lip}$  and mutating  
483 cavity-related amino acid residues result in complete loss or strong reduction of the  
484 stand-alone catalytic activity of  $H_{lip}$ , because they may cause deformation of the cavity,  
485 resulting in failure of the lipoamide-methylamine arm to properly enter the cavity and  
486 consequently failure of GCS reactions. Cohen-Addad *et al.*<sup>36</sup> suggested that the  
487 lipoamide-methylamine arm is locked into a very stable configuration within the  
488 hydrophobic cavity and therefore highly stable against the non-enzymatic hydrolysis  
489 (which leads to the release  $NH_3$  and HCHO) due to nucleophilic attack by water  
490 molecules.

491 However, our experiments surprisingly show that when heated  $H_{ox}$  or a  $H_{ox}$  mutant  
492 was combined with the other GCS proteins, the rate of glycine synthesis was

493 recovered or even increased (**Table 2** and **Figure 7**). This implies that under the given  
494 *in vitro* reaction conditions, heated H<sub>ox</sub> truly acts only as shuttle protein in the  
495 presence of P-, T- and L-proteins, it is unnecessary and even disadvantageous for the  
496 lipoamide-methylamine arm to enter the cavity in order to undergo GCS reactions.  
497 Indeed, there was no obvious decrease of the peak area of H<sub>int</sub> on HPLC even after  
498 hours of waiting, indicating that the hydrolysis of H<sub>int</sub> is very slow (data not shown).  
499 This is in consistence with our recent finding that mutations of the key residue Ser-67  
500 which reduce the residence time of the lipoamide-methylamine arm in the cavity can  
501 significantly increase the *in vitro* GCS activity<sup>39</sup>. The molecular dynamic simulations of  
502 H-protein carried out by our group<sup>39</sup> also implies that the lipoamide-methylamine arm  
503 can leave the cavity of unheated H-protein even without the interaction with T-protein.  
504 This is confirmed by further molecular dynamic simulations of H-protein (results not  
505 published yet). These results therefore raise the question why the  
506 lipoamide-methylamine arm should enter the cavity and be protected in the GCS  
507 system? Based on the fact that the cavity is closely related to the stand-alone catalytic  
508 activity of H-protein, perhaps we may make a bold speculation for the interpretation of  
509 these results from a perspective of evolution. *In vivo*, GCS may have evolved from a  
510 simple system for glycine cleavage catalyzed by H-protein alone at the early time of  
511 evolution to a sophisticated system, in which H-protein is assisted by specialized P-,  
512 T-, L-proteins for more effective catalysis of the GCS reactions to meet the growing  
513 metabolic requirements of organisms. However, the cavity structure and the  
514 stand-alone catalytic functions of H-protein have been retained till now.

515 Oliver<sup>40</sup> discovered that the H-protein and the small subunit of  
516 ribulose-1,5-bisphosphat-carboxylase/-oxygenase (RuBisCo) have obvious  
517 similarities in plants. The two proteins are not only about the same size, but also have  
518 similar mechanism in terms of transcriptional control of the corresponding genes. It  
519 has been reported that there are striking sequence and structure similarity between  
520 H-protein and the E2 protein of pyruvate dehydrogenase complex (PDC)<sup>27</sup>. Therefore,  
521 further research on the catalytic mechanism of H-protein may give useful hints for

522 understanding the evolution and function of PDC and other 2-oxoacid dehydrogenase  
523 multi-enzyme complexes (e.g. alpha-ketoglutarate dehydrogenase complex) which  
524 are all of fundamental importance in cellular metabolism, governing the synthesis of  
525 C1-C4 metabolites for life.

526  $H_{lip}$  alone catalyzes the glycine cleavage and synthesis *in vitro* with the help of the  
527 cofactors PLP, THF and FAD. This seems in contradictory to the results reported in  
528 the previous literature that deletion in *gcvP* or *gcvT* is lethal for organisms<sup>8, 41</sup>. By  
529 comparing the differences between the *in vivo* and *in vitro* conditions, it is conceivable  
530 that *in vivo* these cofactors are stoichiometrically linked to P-, T and L-proteins,  
531 respectively, to play their dedicated catalytic roles in a concerted action with H-protein.  
532 The *in vivo* concentrations of these cofactors are much lower than what we used in  
533 our *in vitro* experiments to facilitate the cleavage or synthesis of glycine catalyzed by  
534 H-protein alone. Thus, at one hand, it may not be feasible for cells to maintain high  
535 concentration pools of these cofactors; at the other hand, it might be beneficial for  
536 cells to have the sophisticated complete GCS system for fast and fine tuning and  
537 adapting of this important system to the changes in metabolic demands. This may be  
538 one reason why P-, T-, L-proteins are necessary *in vivo*. This study shows that for the  
539 stand-alone catalytic functions of  $H_{lip}$  an interaction of FAD with  $H_{lip}$  is required for its  
540 function in the absence of L-protein, and heating-induced structural change of  $H_{lip}$   
541 destroyed the possibility of such interaction (**Figure 5d**). It is most likely that PLP also  
542 needs to interact with  $H_{lip}$  to exert its function in the absence of P-protein. This thus  
543 raises questions: How do PLP and FAD interact with  $H_{lip}$ ? Is it similar to the binding of  
544 PLP to P-protein and FAD to L-protein? To answer these questions, more experiments  
545 will be carried out in the future studies.

546 In addition, the overall reaction rate of GCS with T-protein deficiency was only  
547 reduced to 52 % in the direction of glycine cleavage and 76.5 % for glycine synthesis,  
548 compared to those of the complete GCS, indicating that T-protein had the least effect  
549 on the catalytic activities of GCS. These results are in agreement with the results of  
550 Timm *et al.*<sup>8</sup> who showed that knockdown mutants of *Arabidopsis* containing very low



551 T-protein expression under physiological conditions were able to grow and propagate  
552 in normal air, only showing some minor changes. Meanwhile, their study also found  
553 that the knockout mutation without T-protein expression was lethal even in  
554 non-photorespiratory environment of air enriched to 1 % CO<sub>2</sub>. This result may indicate  
555 that THF needs weak binding with T-protein to participate in glycine cleavage and  
556 synthesis reaction *in vivo*. When the T-protein is completely knocked out, THF cannot  
557 participate in the reaction, resulting in slow reaction rate and plant death. The  
558 deficiency of THF is far more detrimental and has the greatest impact on the reaction  
559 rate of GCS *in vitro* (**Table 1**).

560 Although we have identified the cavity of the H-protein as the key structural region  
561 that determines the catalytic activities of stand-alone H<sub>lip</sub>, the specific catalytic  
562 mechanism is not explored from the perspective of structure and molecular interaction.  
563 By studying the structures and their dynamics of heated and unheated H-proteins, it  
564 will certainly help to better understand the mechanism. This in turn will help to better  
565 engineer H-protein and GCS, leading to new possibilities to improve the growth and  
566 physiology of cells, organisms and plants and to design industrial microbes for  
567 utilizing C1 compounds for biosynthesis.

## 568 **Materials and Methods**

### 569 **Materials**

570 The substrates glycine, nicotinamide adenine dinucleotide (NAD<sup>+</sup>, NADH), Tris  
571 (2-carboxyethyl) phosphine (TCEP) and the derivatization reagents dansyl chloride  
572 were purchased from Yuanye Bio-Technology (Shanghai, China). Dithiothreitol (DTT),  
573 β-mercaptoethanol (β-ME), pyridoxal 5'-phosphate monohydrate (PLP) and flavin  
574 adenine dinucleotide (FAD) were obtained from Aladdin (Shanghai, China).  
575 6-(RS)-Tetrahydrofolate (THF) was obtained from Sigma-Aldrich (St. Louis, MO, USA).  
576 Other chemicals in this study were of analytical grade and purchased from Solarbio  
577 (Beijing, China) or Sinopharm (Shanghai, China), unless otherwise noted. *Escherichia*  
578 *coli* Top10 and BL21 (DE3) were used for plasmid construction and the



579 overexpression of recombinant proteins, respectively. Ni<sup>2+</sup>-NTA resin was purchased  
580 from Genscript (Nanjing, China). Amicon<sup>®</sup> Ultra-15 filtration devices (molecular size  
581 cut-off 10 KDa for H-protein, 30 KDa for T-protein and L-protein and 100 KDa for  
582 P-protein) were purchased from Millipore (Billerica, MA, USA). Mut Express II Fast  
583 Mutagenesis kit V2 was purchased from Vazyme (Jiangsu, China). BCA protein assay  
584 kit and sodium dodecyl sulfate-polyacrylamide gel electrophoresis (SDS-PAGE) gels  
585 were purchased from SolarBio (Beijing, China). Luria-Bertani (LB) medium containing  
586 tryptone (10 g/L), yeast extract (5 g/L) and NaCl (10 g/L) were used for cloning and  
587 expression, and tryptone and yeast extract were purchased from Oxoid.

### 588 ***Enzyme preparation***

589 The plasmids and bacterial strains used in this experiment were given in **Table 3**.  
590 Oligonucleotide sequences of primers used for cloning target proteins were given in  
591 Table 1 of Supplementary Materials. The genes coding for P-protein, T-protein,  
592 L-protein and H-protein were amplified from *E. coli* K12 genomic DNA, then cloned  
593 into the expression vector pET28a (NdeI and XhoI). *E.coli* BL21 (DE3) harboring the  
594 resulting constructs (pET28a-P, pET28a-T, pET28a-L and pET28a-H) were cultured in  
595 LB medium supplemented with 50 mg/L of kanamycin at 37°C until the OD<sub>600</sub> of the  
596 culture reached 0.6-0.8, Isopropyl-beta-D-thiogalactopyranoside (IPTG) was added to  
597 a final concentration of 0.2 mM to induce protein expression for 12 h at 30 °C.

598 The plasmid pET28a-H was used as a template to generate mutations using Mut  
599 Express II Fast Mutagenesis kit V2<sup>39</sup>. Lipoylation of H-protein was performed during  
600 its over-expression *in vivo*. To this end, the strain containing the plasmid pET28a-H or  
601 a H-protein mutant were added with lipoic acid (200 μM, pH 7.0), prior to starting the  
602 cultivation to directly obtain lipoylated H-protein (H<sub>lip</sub>). Following the overexpression,  
603 enzymes were purified as described previously<sup>42</sup>. The purified enzymes were checked  
604 by SDS-PAGE (shown as Figure S1 in Supplementary Materials). In the lane of the H  
605 protein no residuals of T, P and L proteins were found except for the existence of low  
606 amount of the inactive H apo-protein (H<sub>apo</sub>). In addition, HPLC analysis also confirmed  
607 that there was no obvious residual of other GCS proteins in the purified H-protein

608 solutions. H<sub>lip</sub> obtained in such a way is considered to primarily exist in the oxidized  
609 form of H-protein (H<sub>ox</sub>). Whereas H<sub>lip</sub> is mostly used to refer to lipoylated H-protein in  
610 general, it is numerically equivalent to H<sub>ox</sub> in this work when concrete reactions  
611 involving H<sub>lip</sub> are referred to and vice versa.

612 **Table 3. Strains and plasmids used in this study**

|                               | Description                                                       | Reference/Source                |
|-------------------------------|-------------------------------------------------------------------|---------------------------------|
| <b><i>E. coli</i> Strains</b> |                                                                   |                                 |
| Top 10                        | Host for cloning plasmids                                         | WEIDI Ltd.                      |
| BL21 (DE3)                    | Host for protein overexpression and purification                  | WEIDI Ltd.                      |
| <b>Plasmids</b>               |                                                                   |                                 |
| pET28a (+)                    | Plasmid for protein overexpression                                | Novagen                         |
| pET22b (+)                    | Plasmid for protein overexpression                                | Novagen                         |
| pET28a-P                      | pET28a vector containing P-protein gene (NCBI No. WP_112929453.1) | This study                      |
| pET28a-T                      | pET28a vector containing T-protein gene (NCBI No. WP_099356926.1) | This study                      |
| pET28a-L                      | pET28a vector containing L-protein gene (NCBI No. WP_110826218.1) | This study                      |
| pET28a-H                      | pET28a vector containing H-protein gene (NCBI No. WP_001295377.1) | This study                      |
| pET28a-H-K64A                 | pET28a-H containing H-protein gene with point mutation of K64A    | This study                      |
| pET28a-H-E12A                 | pET28a-H containing H-protein gene with point mutation of E12A    | Zhang et al. 2020 <sup>39</sup> |
| pET28a-H-E14A                 | pET28a-H containing H-protein gene with point mutation of E14A    | Zhang et al. 2020 <sup>39</sup> |
| pET28a-H-S67A                 | pET28a-H containing H-protein gene with point mutation of S67A    | Zhang et al. 2020 <sup>39</sup> |
| pET28a-H-D68A                 | pET28a-H containing H-protein gene with point mutation of D68A    | Zhang et al. 2020 <sup>39</sup> |

pET28a-H-Y70A pET28a-H containing H-protein gene Zhang et al. 2020<sup>39</sup>  
with point mutation of Y70A

---

613

614 ***Enzyme activity assays***

615 ***The overall reaction of glycine cleavage***

616 **(1) Glycine cleavage catalyzed by GCS.** The reaction mixture contained Tris-HCl  
617 (50 mM, pH 7.5), 0.5 mM THF, 20 mM DTT, 25  $\mu$ M PLP, 5 mM NAD<sup>+</sup>, 5  $\mu$ M P-protein,  
618 5  $\mu$ M T-protein, 5  $\mu$ M L-protein and 10  $\mu$ M H<sub>ox</sub>. After premixing and centrifugation, the  
619 reactions were initiated by the addition of 50 mM glycine, and carried out for 30 min at  
620 37 °C. The overall GCS activity was determined by measuring either NADH formation  
621 at 340 nm using an Enspire multimode plate reader (PerkinElmer, USA) or  
622 formaldehyde formation according to our previous reported method<sup>17</sup>.

623 **(2) Glycine cleavage enabled by H<sub>iip</sub> alone.** The glycine cleavage reaction enabled  
624 by H<sub>iip</sub> alone was monitored by determining the formation of NADH at 340 nm. The  
625 reaction mixture contained Tris-HCl (50 mM, pH 7.5), 0.5 mM THF, 20 mM DTT, 25  
626  $\mu$ M PLP, 5 mM NAD<sup>+</sup>, 40  $\mu$ M FAD and 10  $\mu$ M H<sub>ox</sub>. The reaction was initiated by adding  
627 50 mM glycine.

628 ***The overall reaction of glycine synthesis***

629 **(1) Glycine synthesis catalyzed by GCS.** The reaction mixture containing Tris-HCl  
630 (50 mM, pH 7.5), 0.5 mM THF, 20 mM DTT, 10 mM HCHO, 25  $\mu$ M PLP, 5 mM NADH,  
631 5  $\mu$ M P-protein, 5  $\mu$ M T-protein, 5  $\mu$ M L-protein and 10  $\mu$ M H<sub>ox</sub>. The reaction was  
632 initiated by adding 50 mM NH<sub>4</sub>HCO<sub>3</sub> to the reaction mixture and carried out for 2 h at  
633 37 °C. The amount of glycine formed was determined using HPLC. One unit of glycine  
634 synthesis activity was defined as the amount (in mg) of H-protein that catalyzed the  
635 formation of 1 nmol of glycine per minute.

636 **(2) Glycine synthesis enabled by H<sub>iip</sub> alone.** The reaction mixture contained  
637 Tris-HCl (50 mM, pH 7.5), 0.5 mM THF (added with  $\beta$ -ME to prevent its oxidative

638 degradation), 10 mM HCHO, 25  $\mu$ M PLP, 50 mM  $\text{NH}_4\text{HCO}_3$ , 40  $\mu$ M FAD and 5 mM  
639 NADH, and different concentration of  $\text{H}_{\text{ox}}$  (10-80  $\mu$ M). Alternatively, 20 mM DTT can be  
640 used to replace FAD and NADH for the reduction of  $\text{H}_{\text{ox}}$  to  $\text{H}_{\text{red}}$ . The reaction condition  
641 and enzyme activity calculation were the same as stated above in 2.3.2 (1).

642 ***Individual GCS reaction steps in the presence of  $\text{H}_{\text{lip}}$  with or without the***  
643 ***corresponding enzymes***

644 **(1) Glycine dcarboxylation reaction catalyzed by P-protein.** The reaction mixture  
645 contained Tris-HCl (50 mM, pH 7.5), 50 mM glycine, 50  $\mu$ M  $\text{H}_{\text{ox}}$  and 25  $\mu$ M PLP. 5  $\mu$ M  
646 P-protein was added to the reaction mixture as the control group. The reaction was  
647 carried out for 2 h at 37 °C. The substrate  $\text{H}_{\text{ox}}$  and the product  $\text{H}_{\text{int}}$  were measured  
648 using HPLC.

649 **(2) Aminomethyl transfer reaction catalyzed by T-protein.** In this reaction of  
650 converting  $\text{H}_{\text{red}}$  to  $\text{H}_{\text{int}}$  through aminomethyl transfer,  $\text{H}_{\text{red}}$  required was generated by  
651 reducing  $\text{H}_{\text{ox}}$  with DTT (see 2.3.3 below), and 5,10- $\text{CH}_2$ -THF was derives from the  
652 condensation of HCHO and THF. Therefore, the reaction mixture contained Tris-HCl  
653 (50 mM, pH 7.5), 50  $\mu$ M  $\text{H}_{\text{ox}}$ , 0.5 mM THF, 20 mM DTT, 50 mM  $\text{NH}_4\text{Cl}$ , and 10 mM  
654 HCHO. 5  $\mu$ M T-protein was added to the reaction mixture as the control group. The  
655 reaction was carried out for 2 h at 37 °C. The substrate  $\text{H}_{\text{ox}}$  and the product  $\text{H}_{\text{int}}$  were  
656 measured by HPLC.

657 ***Electron transfer reaction between  $\text{H}_{\text{ox}}$  and  $\text{H}_{\text{red}}$  with or without the presence of***  
658 ***L-protein***

659 The interconversion of  $\text{H}_{\text{ox}}$  and  $\text{H}_{\text{red}}$  was performed according to a reported  
660 enzymatic assay using an excess amount of a reductant (8 mM TCEP or 20 mM DTT)  
661 for the reduction of the H-protein-bound lipoic acid<sup>34, 35</sup>, and then the produced  $\text{H}_{\text{red}}$  is  
662 re-oxidized by L-protein in the presence of  $\text{NAD}^+$ . For the assay, the reaction mixture  
663 contained different types of buffer (50 mM, pH 7.5), 8 mM TCEP or DTT, 5  $\mu$ M  $\text{H}_{\text{ox}}$  and  
664 0.2  $\mu$ M L-protein. In order to prove that  $\text{H}_{\text{ox}}$  can still undergo redox reaction without  
665 L-protein, 40  $\mu$ M FAD is used instead of L-protein. The reactions were initiated by the

666 addition of 5 mM NAD<sup>+</sup>. The rate of NADH formation was determined  
667 spectrophotometrically at 340 nm.

#### 668 ***Analytical methods using HPLC***

669 H<sub>ox</sub> and H<sub>int</sub> proteins were analyzed based on the HPLC method previously  
670 developed in our lab<sup>33</sup>. The analysis was performed with a Inertsil WP300 C4 column  
671 (5 μm, 4.6×150 mm) and monitored at 280 nm using a diode array detector  
672 (DAD). The mobile phase consisted of acetonitrile (A) and 0.1 % trifluoroacetic acid  
673 aqueous solution (B). The volumn percentage of buffer B was varied as follows:  
674 linearly increased from 30 % to 50 % (0-13.4 min), sharply increased from 50 % to 90 %  
675 (13.4-13.41 min), held at 90 % (13.41-14.2 min), and then sharply decreased to 30 %  
676 (14.2-14.21 min), held at 30 % to 18 min. The flow rate was 1.0 mL·min<sup>-1</sup>.

677 Glycine concentration in the reaction mixture was determined by pre-column dansyl  
678 chloride derivatization. To this end, 40 μL of a reaction mixture was mixed with 160 μL  
679 of 0.2 M NaHCO<sub>3</sub> and 200 μL of 5.4 mg·mL<sup>-1</sup> dansyl chloride in acetonitrile.  
680 Derivatization occurred at 30 °C for 30 min. After the reaction, 600 μL of 0.12 M HCl  
681 was added to adjust the pH of the sample to weak acidic. After centrifuged at 10,000  
682 rpm the supernatant was filtered with 0.22 μm membrane. The dansyl derivative of  
683 glycine was measured using HPLC (Shimadzu LC-2030C system) on a Shim-pack  
684 GIST C<sub>18</sub> column (5 μm, 4.6×150 mm) at 30 °C, with a mobile phase composed of  
685 acetonitrile and 20 mM potassium phosphate buffer pH 6.0 (25:75 v/v) at a flow rate of  
686 0.8 mL/min. The effluent was monitored at 254 nm using a diode array detector (DAD).  
687 The HPLC results of glycine were given in Supplementary materials Figure 2.

688

689 **Statistics and Reproducibility.** Enzyme activities and reaction rates were measured  
690 by three independent experiments and averaged for report. Individual data points are  
691 added in the graphs, and error bars are defined by the standard deviation.

692

693 **Data availability**

694 Major data generated and analyzed during this study are included in the article. The  
695 source data underlying the graphs and charts presented in the main figures are  
696 available as Supplementary Data. Other datasets generated and analyzed during the  
697 study are available from the corresponding author on reasonable request.

698

699 **Acknowledgments and funding**

700 This work was financially supported by the Beijing Advanced Innovation Center for  
701 Soft Matter Science and Engineering, Beijing University of Chemical Technology.

702

703 **Author Contributions**

704 Y.X. designed and performed the experiments, wrote the initial manuscript. Y.L.  
705 assisted in experiments and data analysis. H.Z. provided H-protein mutants and  
706 participated in data analysis. J.N. assisted in experiments and preparing the figures.  
707 J.R. involved in experimental design, data analysis and drafting the manuscript. W. W.  
708 involved in data analysis and revised most of the manuscript content. A.-P.Z.  
709 supervised the project, involved in experimental design, data analysis and discussion,  
710 reviewed and revised the paper.

711

712 **Reference**

- 713 1. Douce R, Bourguignon J, Neuburger M, Rébeillé F. The glycine decarboxylase system: a  
714 fascinating complex. *Trends Plant Sci.* **6**, 167–177 (2001).
- 715 2. Kikuchi G, Motokawa Y, Yoshida T, Hiraga K. Glycine cleavage system: reaction mechanism,  
716 physiological significance, and hyperglycinemia. *Proc. Natl. Acad. Sci. U. S. A.* **84**, 246–263  
717 (2008).
- 718 3. Hong Y, Ren J, Zhang X, Wang W, Zeng A-P. Quantitative analysis of glycine related  
719 metabolic pathways for one-carbon synthetic biology. *Curr. Opin. Biotechnol.* **64**, 70–78  
720 (2020).
- 721 4. Pardal-Fernández JM, Carrascosa-Romero MC, Vega CdC-dl, Iniesta-López I,  
722 Martínez-Gutiérrez A. A typical glycine encephalopathy in an extremely low birth weight  
723 infant: description of a new mutation and clinical and electroencephalographic analysis.  
724 *Epileptic Disord.* **11**, 48–53 (2009).
- 725 5. Azize NAA, *et al.* Mutation analysis of glycine decarboxylase, aminomethyltransferase and  
726 glycine cleavage system protein-H genes in 13 unrelated families with glycine  
727 encephalopathy. *J. Hum. Genet.* **59**, 593–597 (2014).

- 728 6. Zhang WC, *et al.* Glycine decarboxylase activity drives non-small cell lung cancer  
729 tumor-initiating cells and tumorigenesis. *Cell* **148**, 259-272 (2012).
- 730 7. Kang PJ, *et al.* Glycine decarboxylase regulates the maintenance and induction of  
731 pluripotency via metabolic control. *Metab. Eng.* **53**, 35-47 (2019).
- 732 8. Timm S, *et al.* T-protein is present in large excess over the other proteins of the glycine  
733 cleavage system in leaves of Arabidopsis. *Planta* **247**, 41-51 (2018).
- 734 9. Timm S, *et al.* Mitochondrial dihydrolipoyl dehydrogenase activity shapes photosynthesis and  
735 photorespiration of *arabidopsis thaliana*. *Plant Cell* **27**, 1968-1984 (2015).
- 736 10. Lopez-Calcagno P, Fisk S, L. Brown K, E. Bull S, F. South P, A. Raines C.  
737 Overexpressing the H-protein of the glycine cleavage system increases biomass yield in  
738 glasshouse and field-grown transgenic tobacco plants. *Plant Biotechnol. J.* **17**, 1-11 (2018).
- 739 11. Gariboldi R, T. , Drake H, L. . Glycine synthase of the purinolytic bacterium, *Clostridium*  
740 *acidurici*. Purification of the glycine-CO<sub>2</sub> exchange system. *J. Biol. Chem.* **259**, 6085-6089  
741 (1984).
- 742 12. Schneeberger A, Frings J, Schink B. Net synthesis of acetate from CO<sub>2</sub> by *Eubacterium*  
743 *acidaminophilum* through the glycine reductase pathway. *FEMS Microbiol. Lett.* **177**, 1-6  
744 (1999).
- 745 13. Kechi H, Kikuchi G. Mechanism of the reversible glycine cleavage reaction in arthrobacter  
746 globiformis. I. purification and function of protein components required for the reaction. *J.*  
747 *Biochem.* **75**, 1113-1127 (1974).
- 748 14. Hideo K, Goro K. Mechanism of reversible glycine cleavage reaction in Arthrobacter  
749 globiformis: function of lipoic acid in the cleavage and synthesis of glycine. *Arch. Biochem.*  
750 *Biophys.* **173**, 71-81 (1976).
- 751 15. Kawasaki H, Sato T, Kikuchi G. A new reaction for glycine biosynthesis. *Biochem. Biophys.*  
752 *Res. Commun.* **23**, 227-233 (1966).
- 753 16. Kochi H, Kikuchi G. Reactions of glycine synthesis and glycine cleavage catalyzed by  
754 extracts of *Arthrobacter globiformis* grown on glycine. *Arch. Biochem. Biophys.* **132**,  
755 359-369 (1969).
- 756 17. Hiraga K, Kechi H, Motokawa Y, Kikuchi G. Enzyme complex nature of reversible glycine  
757 cleavage system of cock liver mitochondria. *J. Biol. Chem.* **72**, 1285-1289 (1972).
- 758 18. Bar-Even A, Noor E, Flamholz A, Milo R. Design and analysis of metabolic pathways  
759 supporting formatotrophic growth for electricity-dependent cultivation of microbes. *Biochim.*  
760 *Biophys. Acta-Bioenerg.* **1827**, 1039-1047 (2013).
- 761 19. Sánchez-Andrea I, *et al.* The reductive glycine pathway allows autotrophic growth of  
762 *Desulfovibrio desulfuricans*. *Nat. Commun.* **11**, 5090 (2020).

- 763 20. Yishai O, Bouzon Madeleine, Döring V, Bar-Even A. In Vivo Assimilation of One-Carbon via  
764 a Synthetic Reductive Glycine Pathway in *Escherichia coli*. *ACS Synth. Biol.* **7**, 2023–2028  
765 (2018).
- 766 21. Bang J, Lee SY. Assimilation of formic acid and CO<sub>2</sub> by engineered *Escherichia coli*  
767 equipped with reconstructed one-carbon assimilation pathways. *Proc. Natl. Acad. Sci. U. S.*  
768 *A.* **115**, E9271–E9279 (2018).
- 769 22. Kim S, Aslan SNLS, Yishai O, Wenk S, Schann K, Bar-Even A. Growth of *E. coli* on formate  
770 and methanol via the reductive glycine pathway. *Nat. Chem. Biol.* **16**, 538–545 (2020).
- 771 23. Bang J, Hwang CH, Ahn JH, Lee JA, Lee SY. *Escherichia coli* is engineered to grow on CO<sub>2</sub>  
772 and formic acid. *Nat. Microbiology* **5**, 1459–1463 (2020).
- 773 24. Cruz JGdl, Machens F, Messerschmidt K, Bar-Even A. Core catalysis of the reductive  
774 glycine pathway demonstrated in yeast. *ACS Synth. Biol.* **8**, 911–917 (2019).
- 775 25. Claassens NJ, Bordanaba-Florit G, Cotton CAR, Maria AD, Bar-Even A. Replacing the  
776 Calvin cycle with the reductive glycine pathway in *Cupriavidus necator*. *Metab. Eng.* **62**,  
777 30–41 (2020).
- 778 26. Hong Y, Arbter P, Wang W, Rojas LN, Zeng A. Introduction of glycine synthase enables  
779 uptake of exogenous formate and strongly impacts the metabolism in *Clostridium*  
780 *pasteurianum*. *Biotechnol. Bioeng.* **112**, doi.org/10.1002/bit.27658 (2020).
- 781 27. Cronan JE. Assembly of lipoic acid on its cognate enzymes: an extraordinary and essential  
782 biosynthetic pathway. *Microbiol. Mol. Biol. Rev.* **80**, 429–450 (2016).
- 783 28. Kazuko O-I, *et al.* Crystal structure of aminomethyltransferase in complex with  
784 dihydrolipoyl-H-protein of the glycine cleavage system. *J. Biol. Chem.* **285**, 18684–18692  
785 (2010).
- 786 29. Nakai T, Nakagawa N, Maoka N, Masui R, Kuramitsu S, Kamiya N. Structure of P-protein of  
787 the glycine cleavage system: implications for nonketotic hyperglycinemia. *Embo J.* **24**,  
788 1523–1536 (2005).
- 789 30. Hasse D, *et al.* Structure of the homodimeric glycine decarboxylase P-protein from  
790 *Synechocystis* sp. PCC 6803 suggests a mechanism for redox regulation. *J. Biol. Chem.* **288**,  
791 35333–35345 (2013).
- 792 31. Go MK, Zhang WC, Bing L, Wen SY. Glycine decarboxylase is an unusual amino acid  
793 decarboxylase involved in tumorigenesis. *Biochemistry* **53**, 947–956 (2014).
- 794 32. Fujiwara K, Toma S, Okamura-Ikeda K, Motokawa Y, Nakagawa A, Taniguchi H. Crystal  
795 structure of lipoate-protein ligase A from *Escherichia coli*. determination of the lipoic  
796 acid-binding site. *J. Biol. Chem.* **280**, 33645–33651 (2005).



- 797 33. Zhang X, Nie J, Zheng Y, Ren J, Zeng AP. Activation and competition of lipoylation of H  
798 protein and its hydrolysis in a reaction cascade catalyzed by the multifunctional enzyme  
799 lipoate-protein ligase A. *Biotechnol. Bioeng.* **117**, 3677–3687 (2020).
- 800 34. Neuburger M, *et al.* Interaction between the lipoamide-containing H-protein and the  
801 lipoamide dehydrogenase (L-protein) of the glycine decarboxylase multienzyme system. *Eur.*  
802 *J. Biochem.* **267**, 2882–2889 (2000).
- 803 35. Gueguen V, *et al.* Structural and functional characterization of H protein mutants of the  
804 glycine decarboxylase complex. *J. Biol. Chem.* **274**, 26344–26352 (1999).
- 805 36. Claudine C-A, Serge P, Larry S, Michel N, Roland D. The lipoamide arm in the glycine  
806 decarboxylase complex is not freely swinging. *Nat. Struct. Biol.* **2**, 63–68 (1995).
- 807 37. Guilhaudis L, *et al.* Combined structural and biochemical analysis of the H-T complex in the  
808 glycine decarboxylase cycle: evidence for a destabilization mechanism of the H-protein.  
809 *Biochemistry* **39**, 4259–4266 (2000).
- 810 38. Okamura-Ikeda K, *et al.* Crystal structure of human T-protein of glycine cleavage system at  
811 2.0 Å resolution and its implication for understanding non-ketotic hyperglycinemia. *J. Mol.*  
812 *Biol.* **351**, 1146–1159 (2005).
- 813 39. Zhang H, Li Y, Nie J, Jie R, Zeng A-P. Structure-based dynamic analyses of the glycine  
814 cleavage system suggests key residues for control of a key reaction step. *Commun. Biol.* **3**,  
815 756 (2020).
- 816 40. Oliver D, J. The glycine decarboxylase complex from plant mitochondria. *Annu. Rev. Plant*  
817 *Physiol Plant Mol. Biol.* **45**, 323–337 (1994).
- 818 41. Nadja E, *et al.* Deletion of glycine decarboxylase in Arabidopsis is lethal under  
819 nonphotorespiratory conditions. *Plant Physiol.* **144**, 1328–1335 (2007).
- 820 42. Xu Y, Meng H, Ren J, Zeng A-P. Formaldehyde formation in the glycine cleavage system and  
821 its use for an aldolase-based biosynthesis of 1,3-propanediol. *J. Biol. Eng.* **14**, 15 (2020).

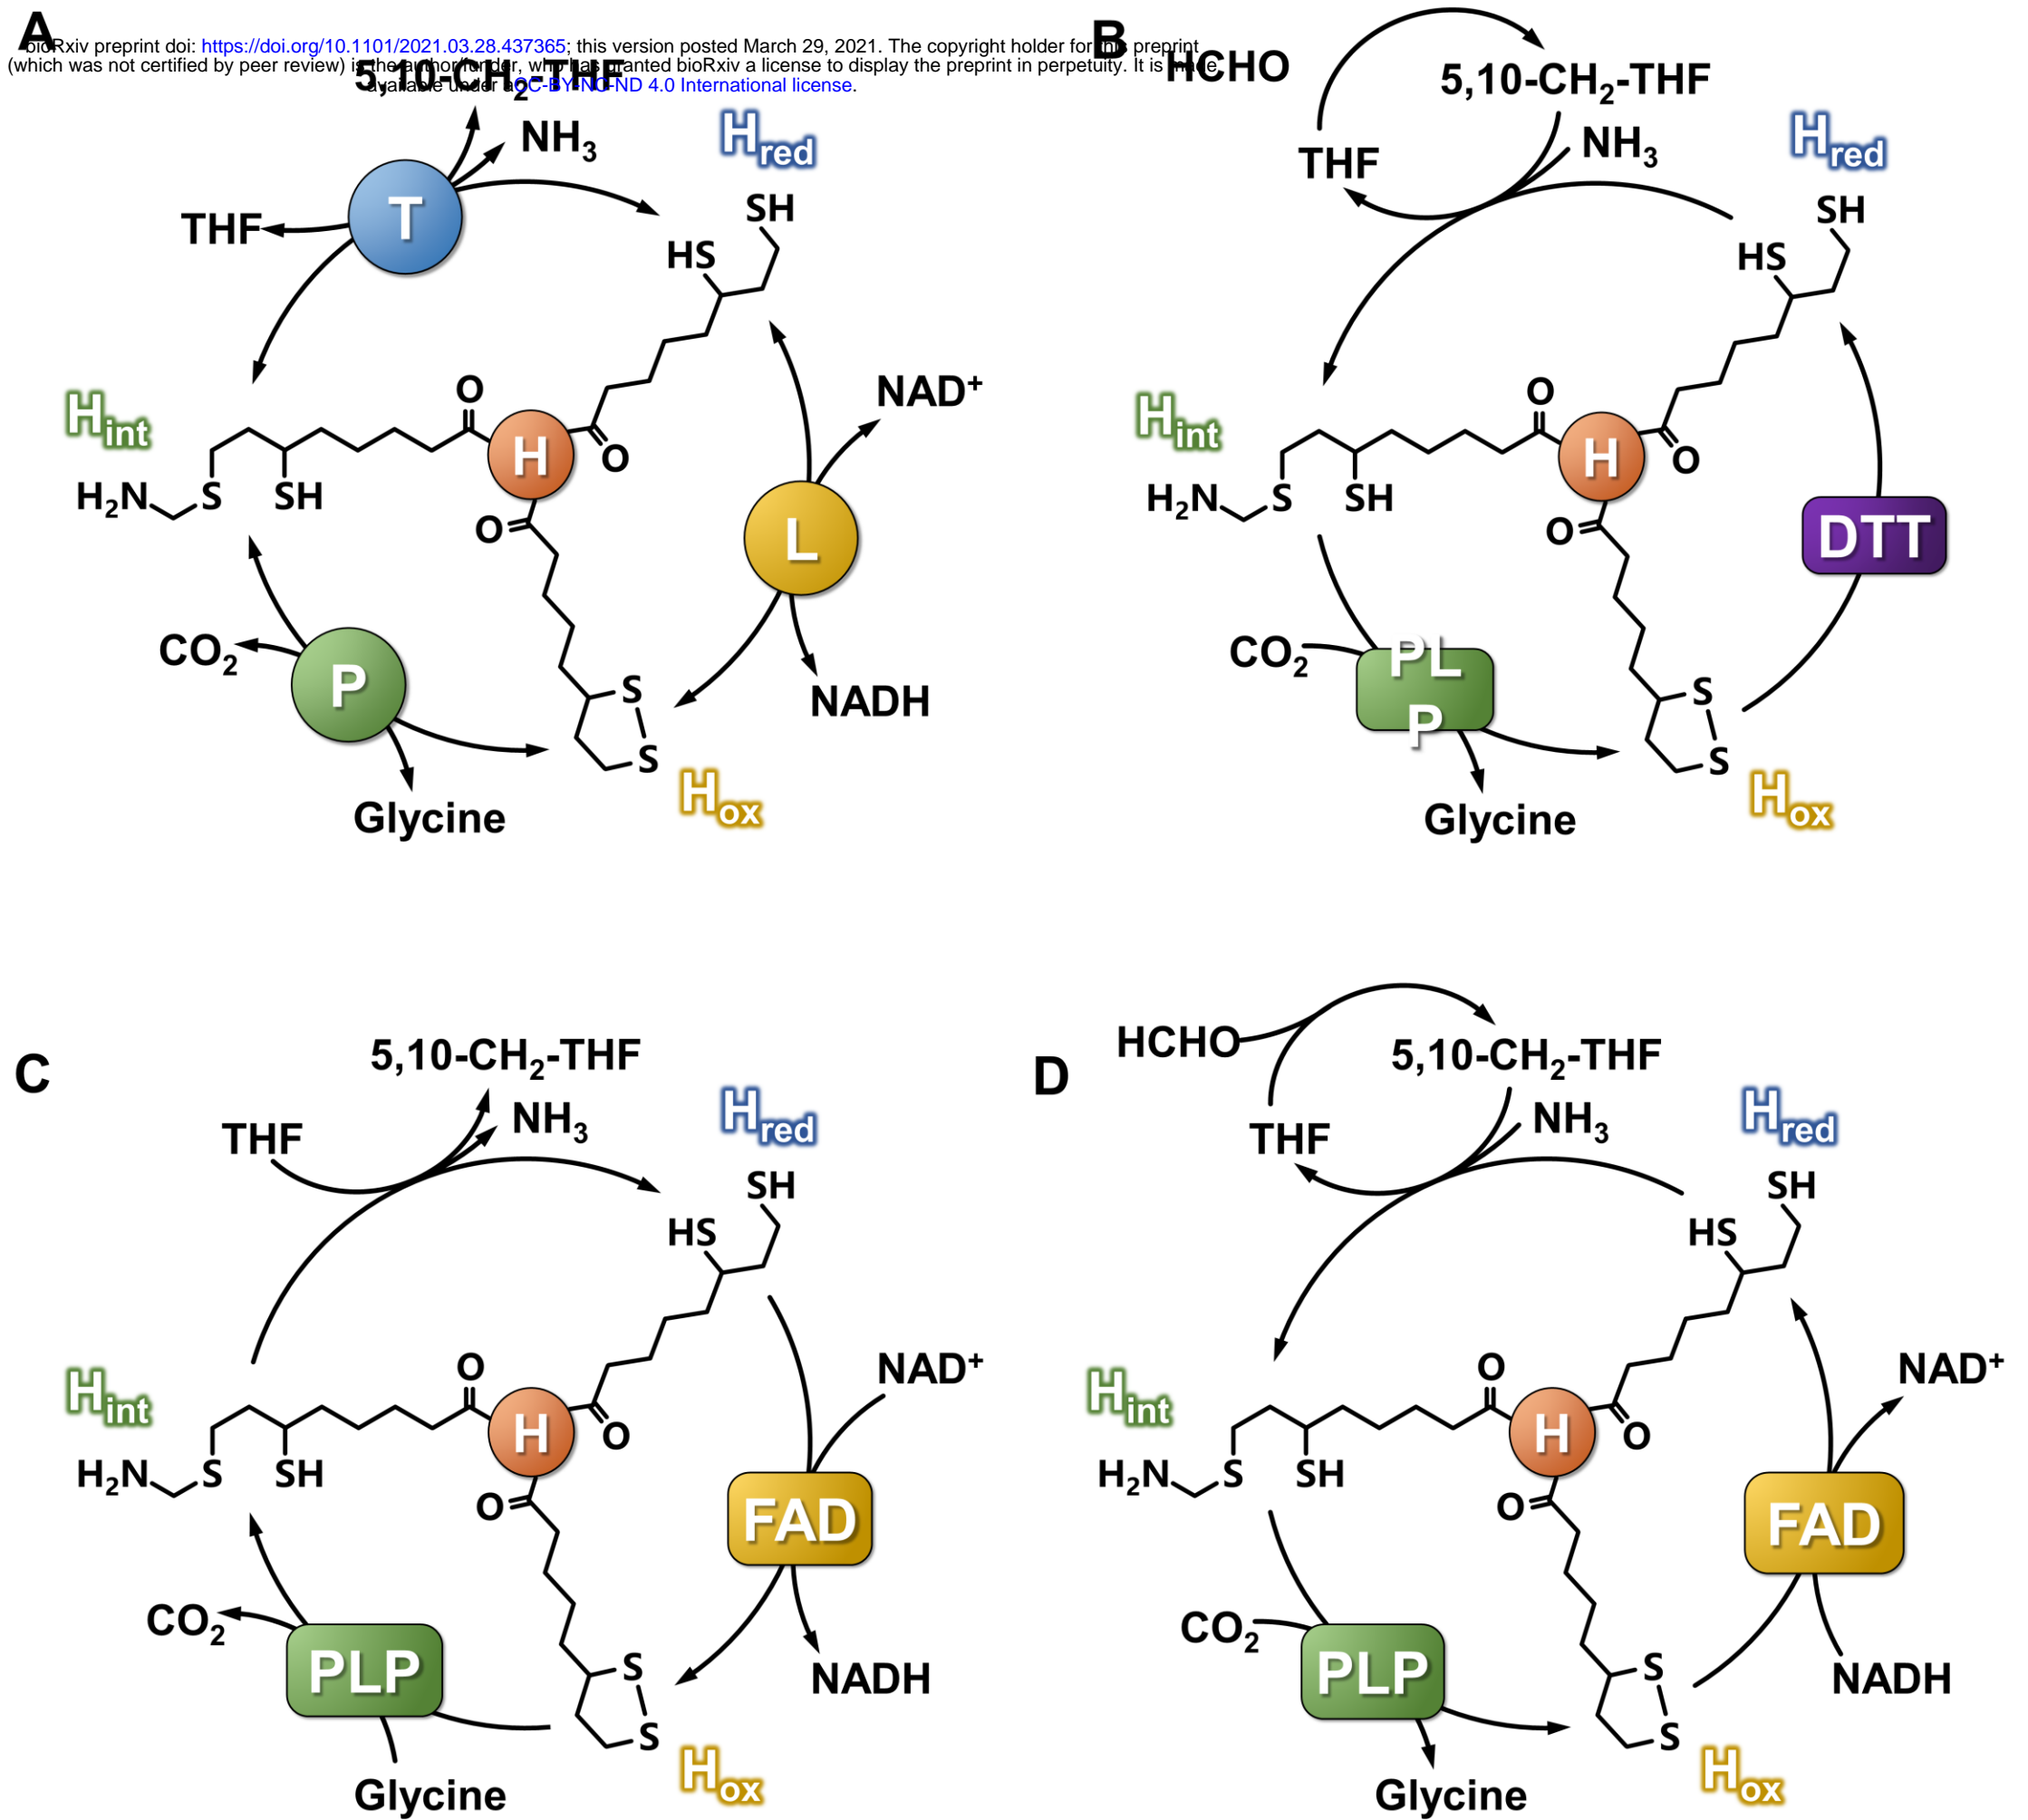

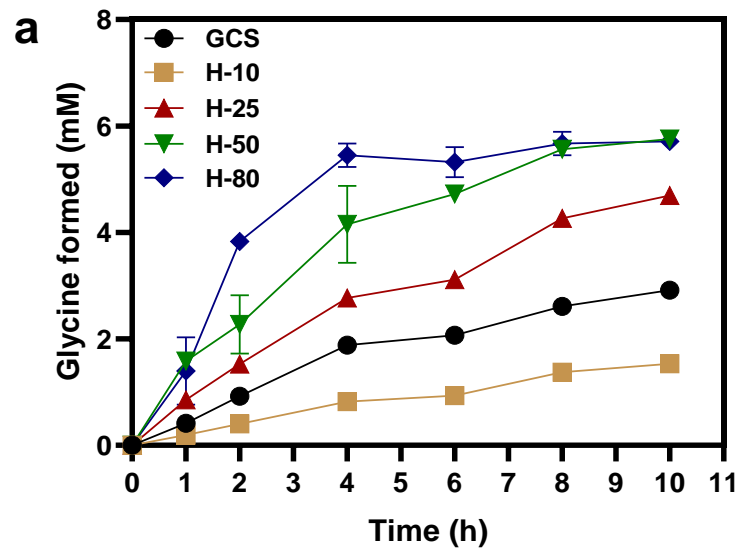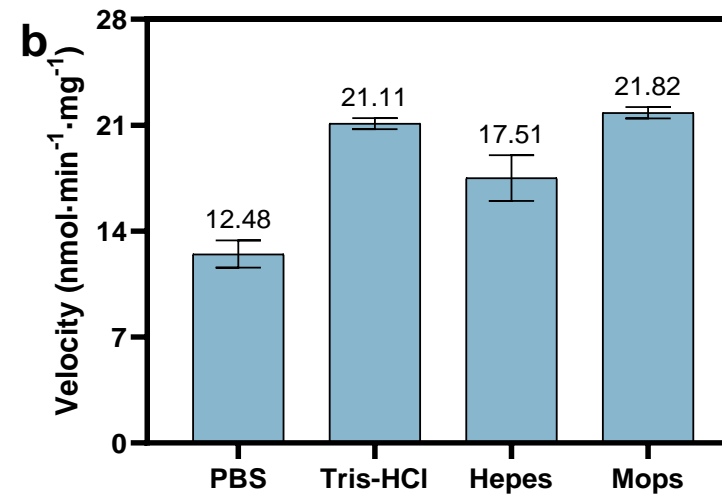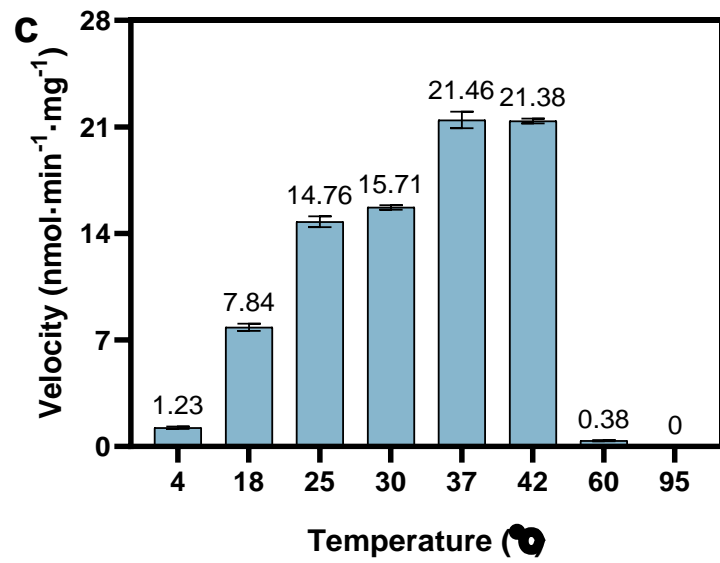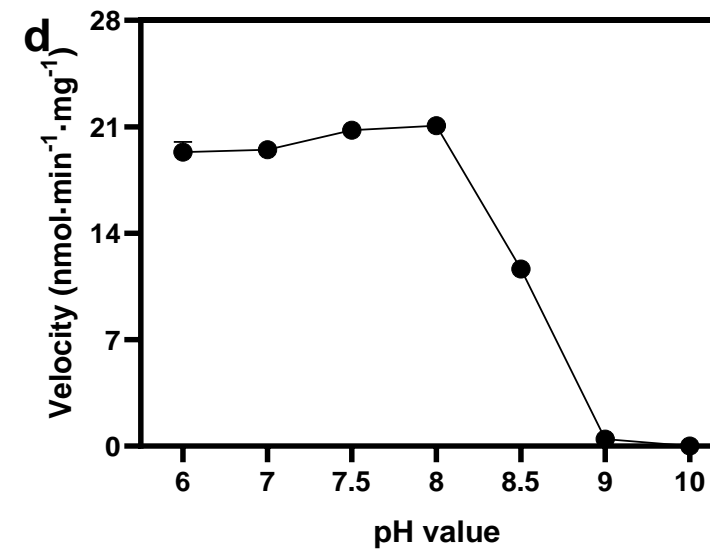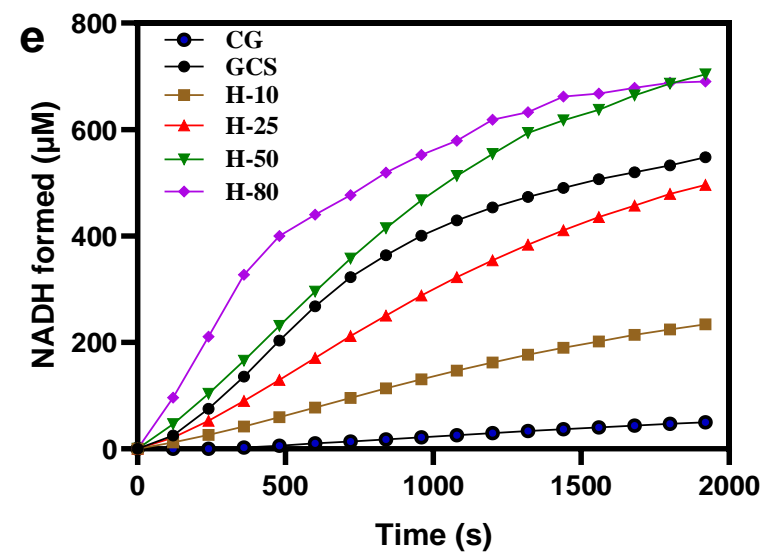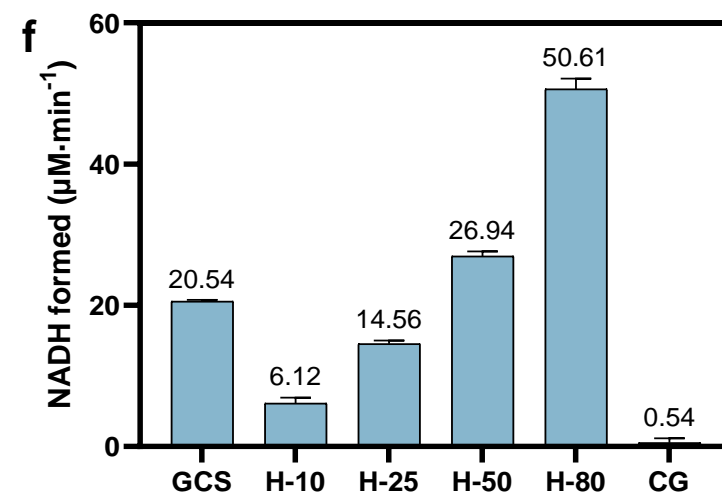

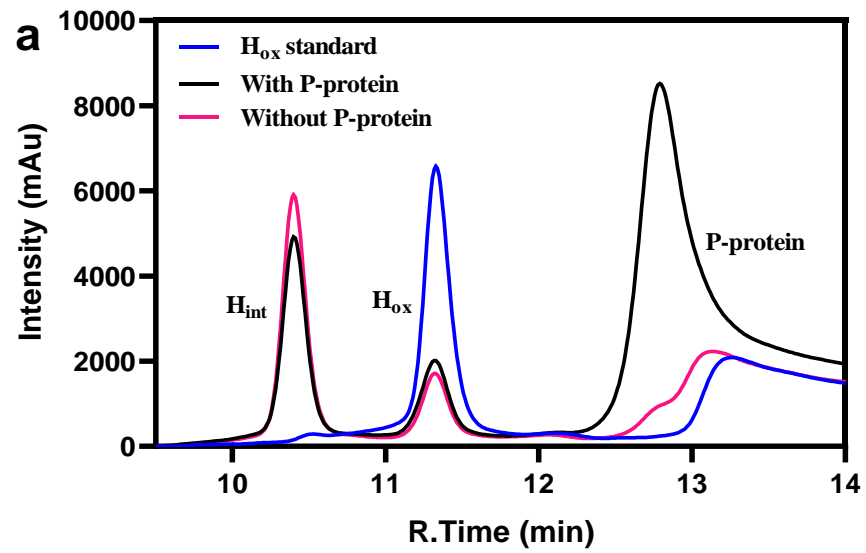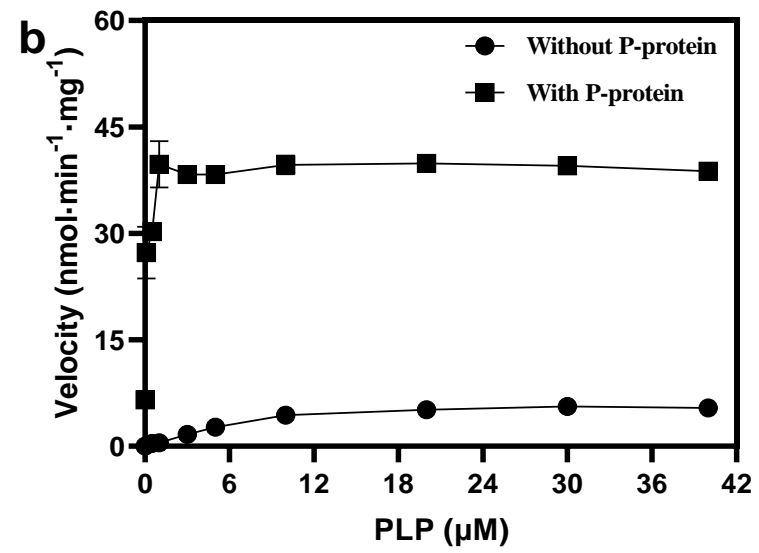

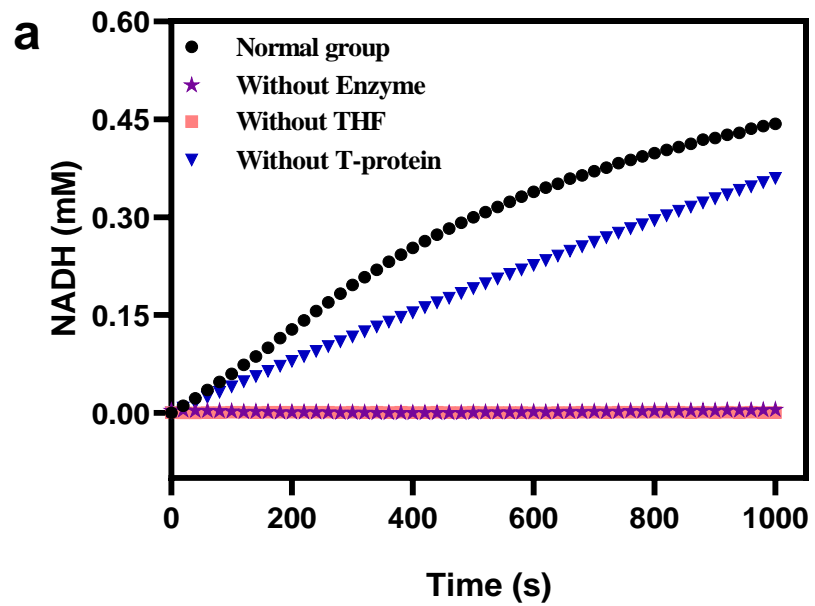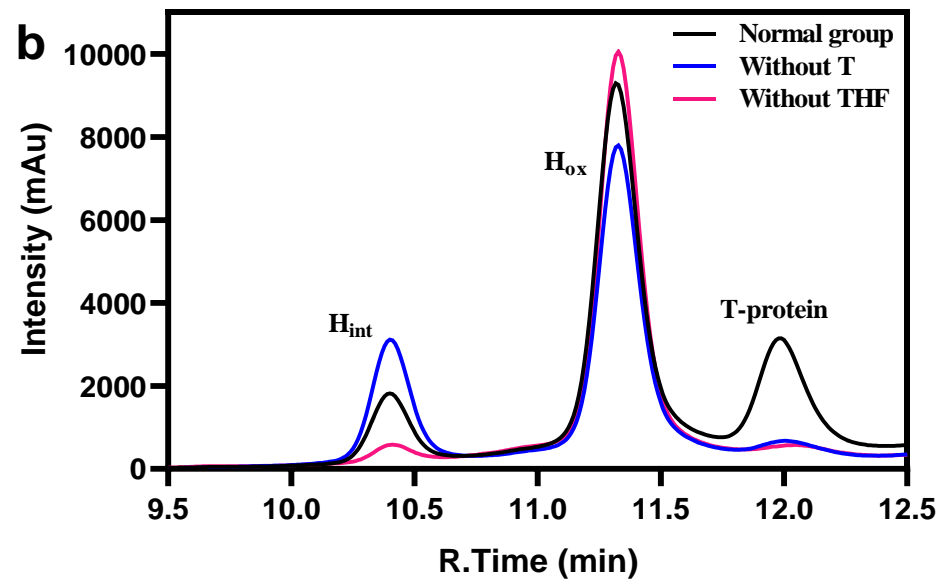

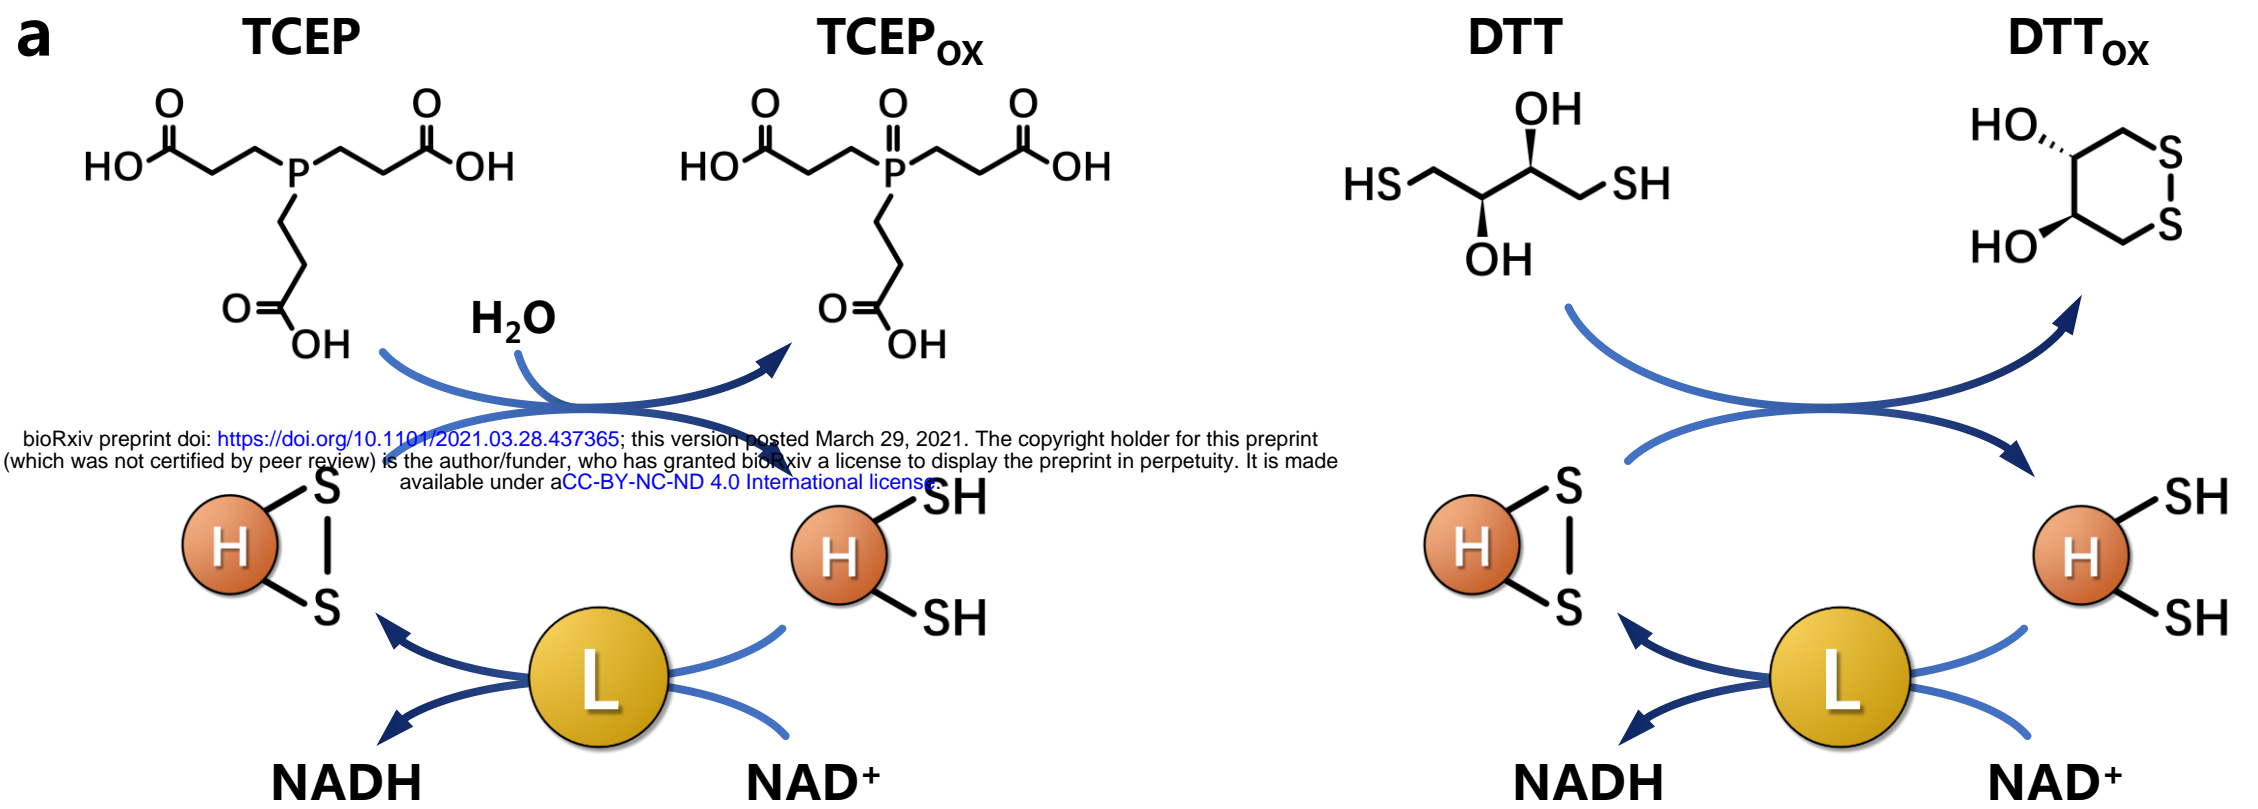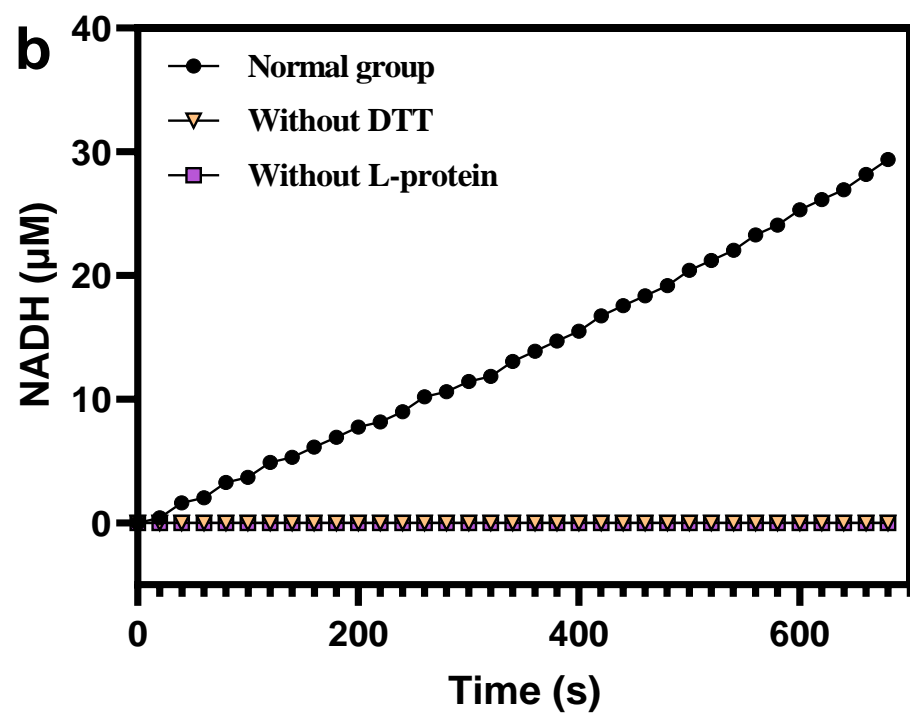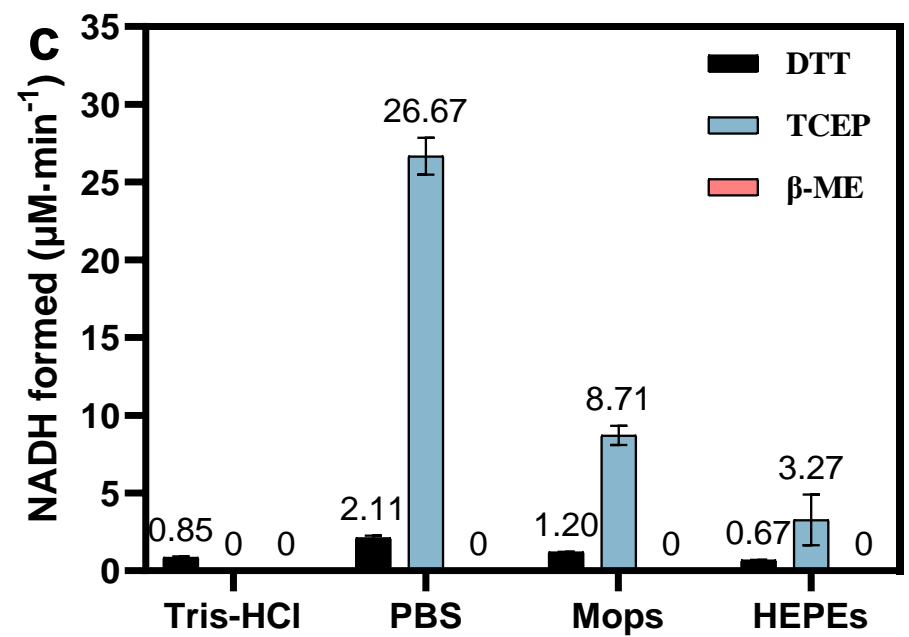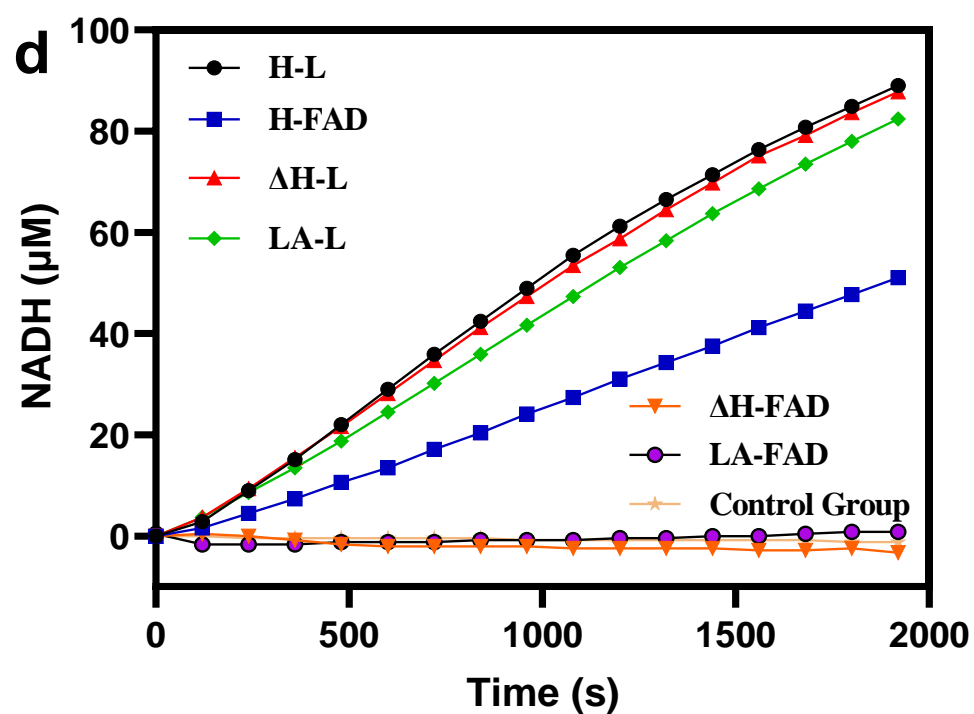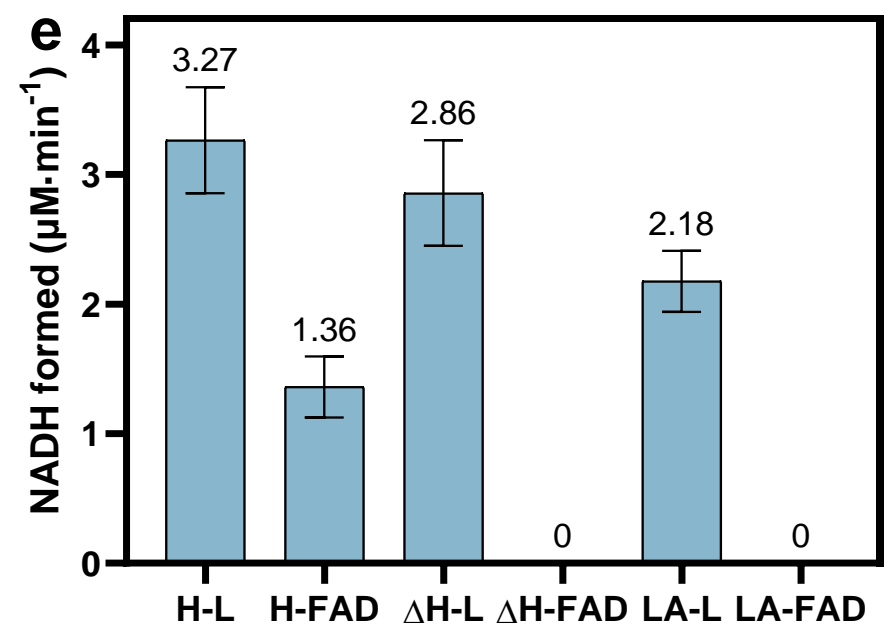

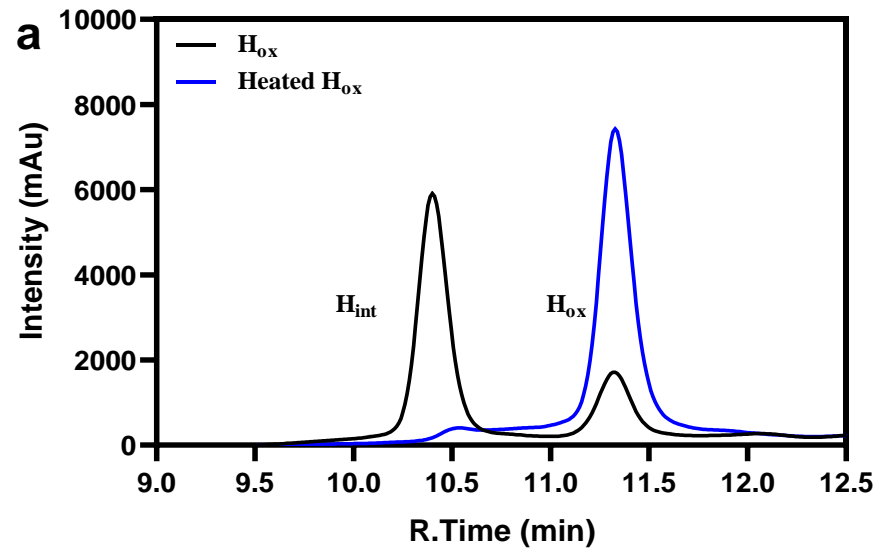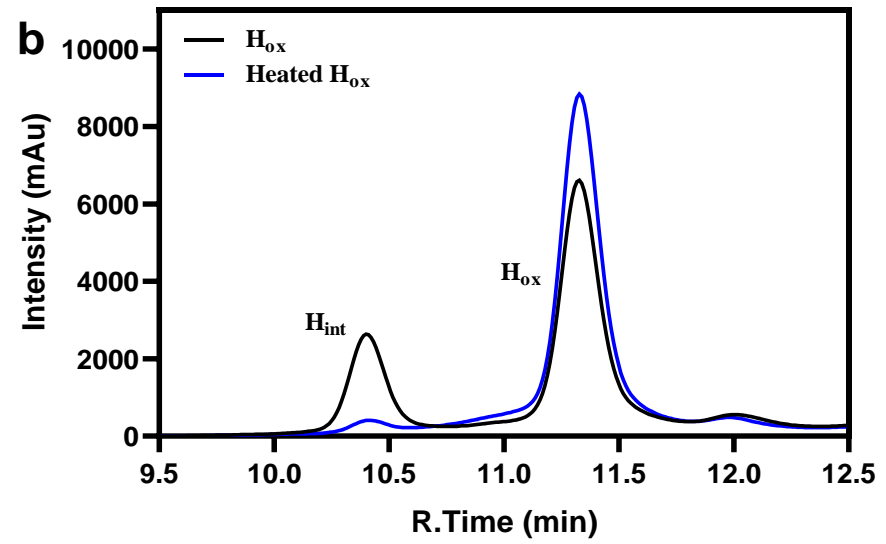

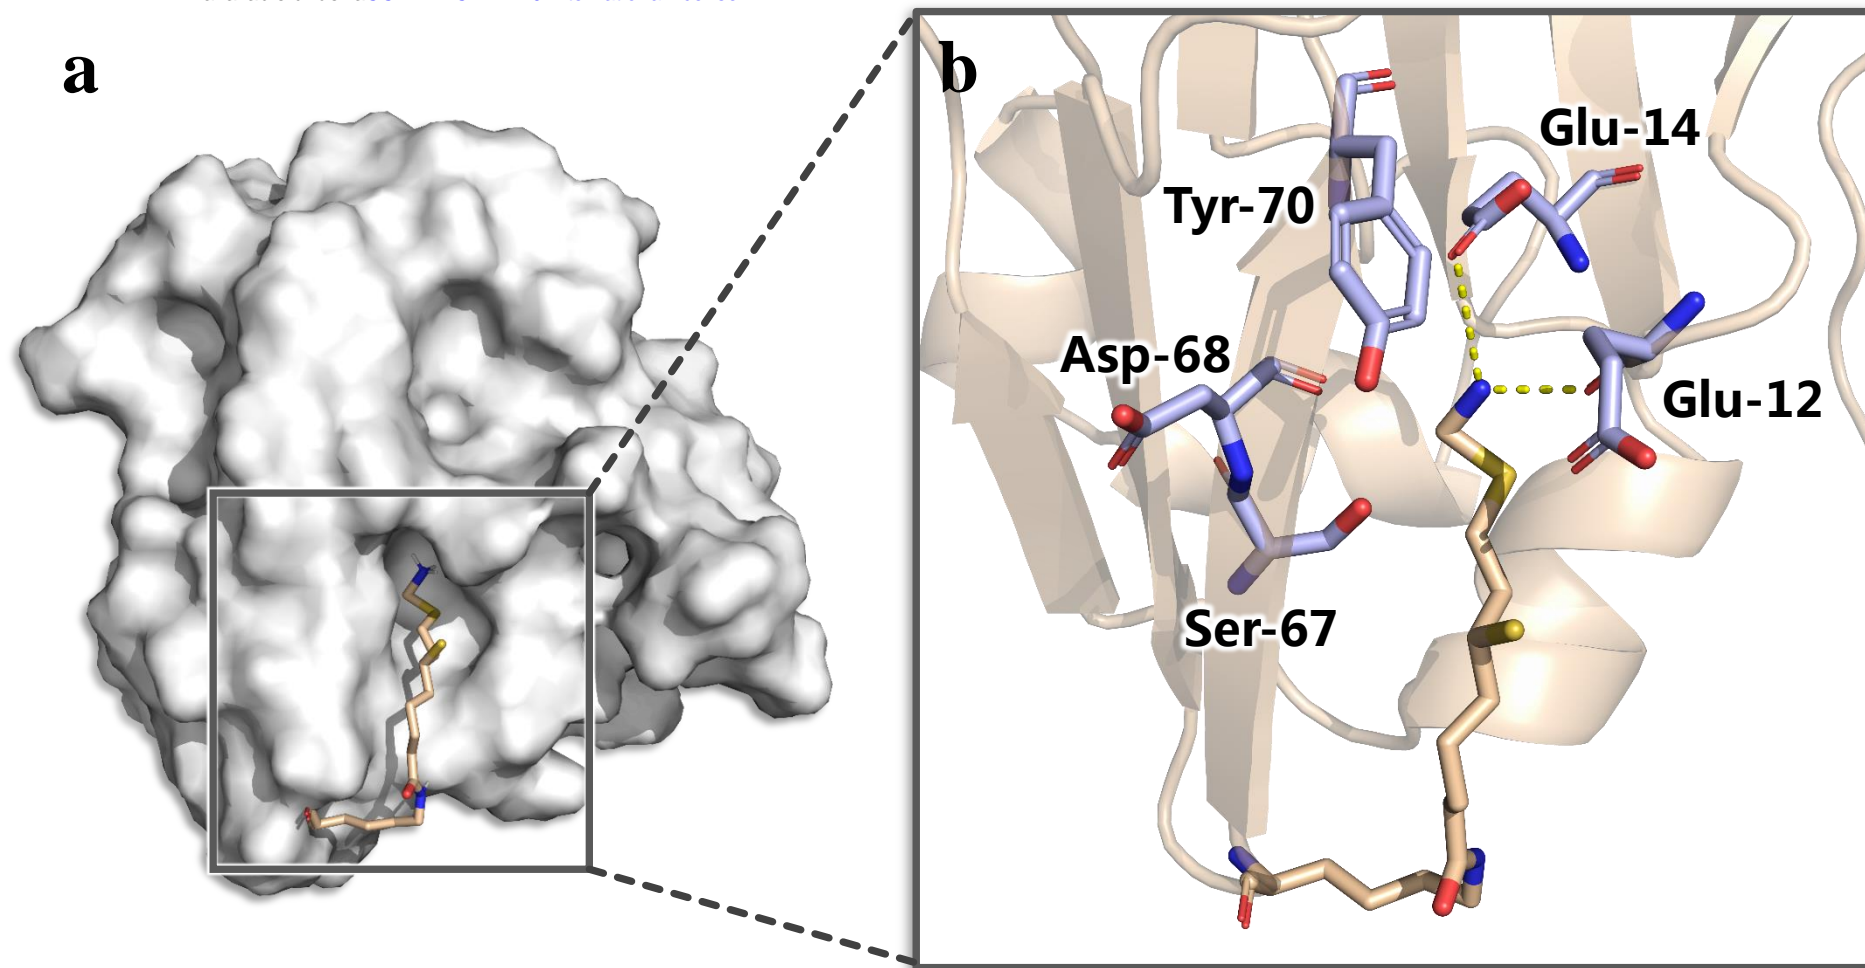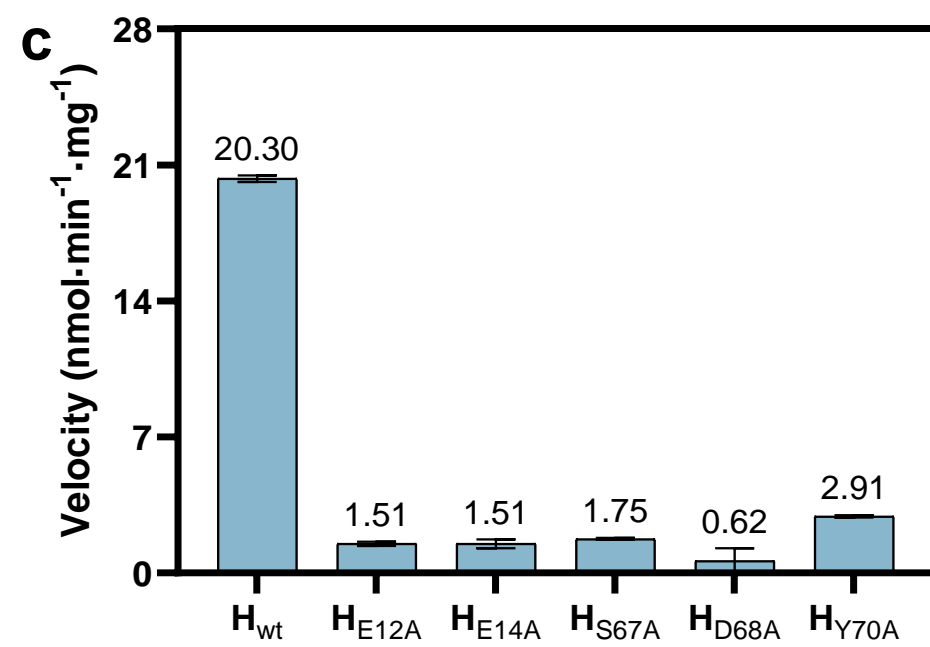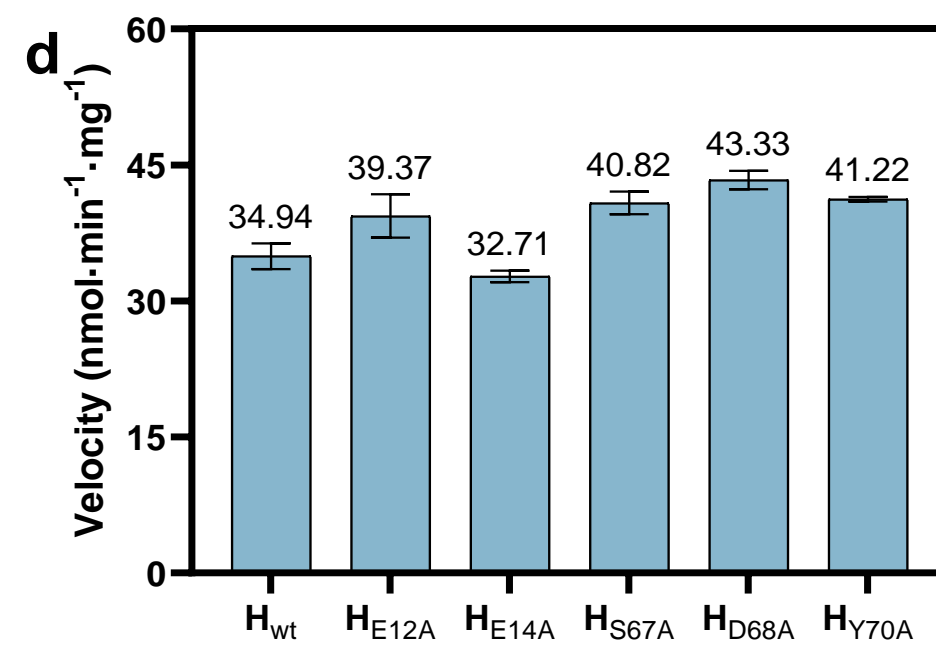

Source: https://www.biorxiv.org/content/10.1101/2021.03.28.437365v1.full.pdf
